# Supplementary material
Source: publisher figshare collection journal article supplement (https://tandf.figshare.com/articles/dataset/_/20449079)
Supplement: Supplementary file 1 [file 1]

# Nonparametric, Stochastic Frontier Models with Multiple Inputs and Outputs: Supplementary Material

LÉOPOLD SIMAR

PAUL W. WILSON\*

July 2022

---

\*Simar: Institut de Statistique, Biostatistique, et Sciences Actuarielles, Université Catholique de Louvain-la-Neuve, Louvain-la-Neuve, Belgium; email: [leopold.simar@uclouvain.be](mailto:leopold.simar@uclouvain.be).

Wilson: Department of Economics and School of Computing, Clemson University, Clemson, South Carolina, USA and Research Fellow, Federal Reserve Bank of St. Louis, St. Louis, Missouri, USA; email: [pww@clemson.edu](mailto:pww@clemson.edu).

We are grateful for (i) the Palmetto cluster operated by the Cyber Infrastructure Technology Integration group at Clemson University, and (ii) high-performance computing equipment purchased with funds from U.S. National Science Foundation MRI award no. 1725573. The views expressed in this article are those of the authors and do not necessarily reflect the views of the Federal Reserve System, the Board of Governors, or the regional Federal Reserve Banks. Any remaining errors are solely our responsibility.

# Contents

|                                                                      |           |
|----------------------------------------------------------------------|-----------|
| <b>A Flexibility of the Stochastic Specification</b>                 | <b>1</b>  |
| <b>B Handling the “Wrong Skewness” Problem</b>                       | <b>3</b>  |
| <b>C Alternative Approaches for Dealing with Unexpected Skewness</b> | <b>6</b>  |
| C.1 Sign-Constrained Local Linear Least Squares . . . . .            | 6         |
| C.2 Local Exponential smoothing . . . . .                            | 7         |
| <b>D Some Alternative Approaches for Estimation</b>                  | <b>9</b>  |
| <b>E Some Extensions</b>                                             | <b>11</b> |
| E.1 The Cases of Hyperbolic and Radial Distances . . . . .           | 11        |
| E.2 Introducing Exogenous Environmental Variables . . . . .          | 12        |
| E.3 Stochastic Versions of FDH/DEA-Type Estimators . . . . .         | 12        |
| E.4 Data-Driven Direction . . . . .                                  | 13        |
| <b>F Monte Carlo Evidence</b>                                        | <b>15</b> |
| F.1 Experimental Framework . . . . .                                 | 15        |
| F.2 Half-Normal Inefficiency . . . . .                               | 16        |
| F.3 Exponential Inefficiency . . . . .                               | 20        |
| <b>G Additional Results on the Efficiency of US Banks</b>            | <b>39</b> |
| G.1 Results Mentioned in Section 4 . . . . .                         | 39        |
| G.2 Results Obtained from HMS Estimators . . . . .                   | 44        |

# List of Tables

|      |                                                                                                                                                                                            |    |
|------|--------------------------------------------------------------------------------------------------------------------------------------------------------------------------------------------|----|
| F.1  | IMSE for Frontier Estimates with No Heteroskedasticity . . . . .                                                                                                                           | 23 |
| F.2  | Differences in IMSE, HMS versus SVKZ, No Heteroskedasticity . . . . .                                                                                                                      | 24 |
| F.3  | IMSE for Frontier Estimates with Heteroskedastic Inefficiency and Noise . . . . .                                                                                                          | 25 |
| F.4  | Differences in IMSE, HMS versus SVKZ, Heteroskedastic Inefficiency and Noise . . . . .                                                                                                     | 26 |
| F.5  | Differences in IMSE for SVKZ Estimator Due to Heteroskedasticity . . . . .                                                                                                                 | 27 |
| F.6  | Differences in IMSE for HMS Estimator Due to Heteroskedasticity . . . . .                                                                                                                  | 28 |
| F.7  | Median Average Square Error for Derivatives of Expected Efficiency $\mu_\eta(Z)$ ,<br>with Heteroskedasticity . . . . .                                                                    | 29 |
| F.8  | Median Average Square Error for Estimated Marginal Product, with Het-<br>eroskedasticity . . . . .                                                                                         | 30 |
| F.9  | IMSE for Frontier Estimates with No Heteroskedasticity (Exponential Ineffi-<br>ciency) . . . . .                                                                                           | 31 |
| F.10 | IMSE for Frontier Estimates with Heteroskedastic, Exponential Inefficiency<br>and Noise . . . . .                                                                                          | 32 |
| F.11 | Median Average Square Error for Derivatives of Expected Efficiency $\mu_\eta(Z)$ ,<br>with Heteroskedasticity . . . . .                                                                    | 33 |
| F.12 | Median Average Square Error for Estimated Marginal Product, with Het-<br>eroskedasticity . . . . .                                                                                         | 34 |
| F.13 | Differences in IMSE for Frontier Estimates, Exponential versus Half-Normal<br>Inefficiency, No Heteroskedasticity . . . . .                                                                | 35 |
| F.14 | Differences in IMSE for Frontier Estimates, Exponential versus Half-Normal<br>Inefficiency, Heteroskedastic Inefficiency and Noise . . . . .                                               | 36 |
| F.15 | Differences in Median Average Square Error for Derivatives of Expected Effi-<br>ciency $\mu_\eta(Z)$ , Exponential versus Half-Normal Inefficiency, with Heteroskedas-<br>ticity . . . . . | 37 |
| F.16 | Differences in Median Average Square Error for Estimated Marginal Product,<br>Exponential versus Half-Normal Inefficiency, with Heteroskedasticity . . . . .                               | 38 |
| G.1  | Summary Statistics for Data Used in Empirical Example . . . . .                                                                                                                            | 40 |
| G.2  | Bandwidths used for Local-Linear Regressions in Banking Application . . . . .                                                                                                              | 41 |
| G.3  | Summary Statistics for Estimated Derivatives (SVKZ) . . . . .                                                                                                                              | 42 |
| G.4  | Percentage of Estimated Derivatives of $\mu_\eta(W_i^\partial)$ Less than, Equal to or Greater<br>than Zero (SVKZ Estimates) . . . . .                                                     | 43 |
| G.5  | Summary Statistics for Estimated Derivatives (HMS) . . . . .                                                                                                                               | 46 |
| G.6  | Percentage of Estimated Derivatives of $\mu_\eta(W_i^\partial)$ Less than, Equal to or Greater<br>than Zero (HMS Estimates) . . . . .                                                      | 47 |

## List of Figures

|     |                                                                                          |    |
|-----|------------------------------------------------------------------------------------------|----|
| A.1 | Half-Normal Inefficiency with Various Symmetric Noise Distributions . . . .              | 2  |
| G.1 | Sample Average and Median Values of $\hat{\mu}_\eta(Z_i)$ , HMS Estimates, 2001Q1–2020Q4 | 48 |

## A Flexibility of the Stochastic Specification

As noted in the main paper, our stochastic specification consisting of a symmetric, two-sided noise process and a local half-normal inefficiency process is quite flexible. This is illustrated in Figure A.1 for the particular choice of the one-parameter scale density in Assumption 2.5, with various values of the scale parameter  $\sigma_\eta$  and various symmetric densities for  $\epsilon$  (Normal, Laplace, Uniform and a Mixture of two Normal densities). Figure A.1 shows that the density of the convolution of noise and efficiency distributions can have a wide variety of shapes under our assumptions.

**Figure A.1:** Half-Normal Inefficiency with Various Symmetric Noise Distributions

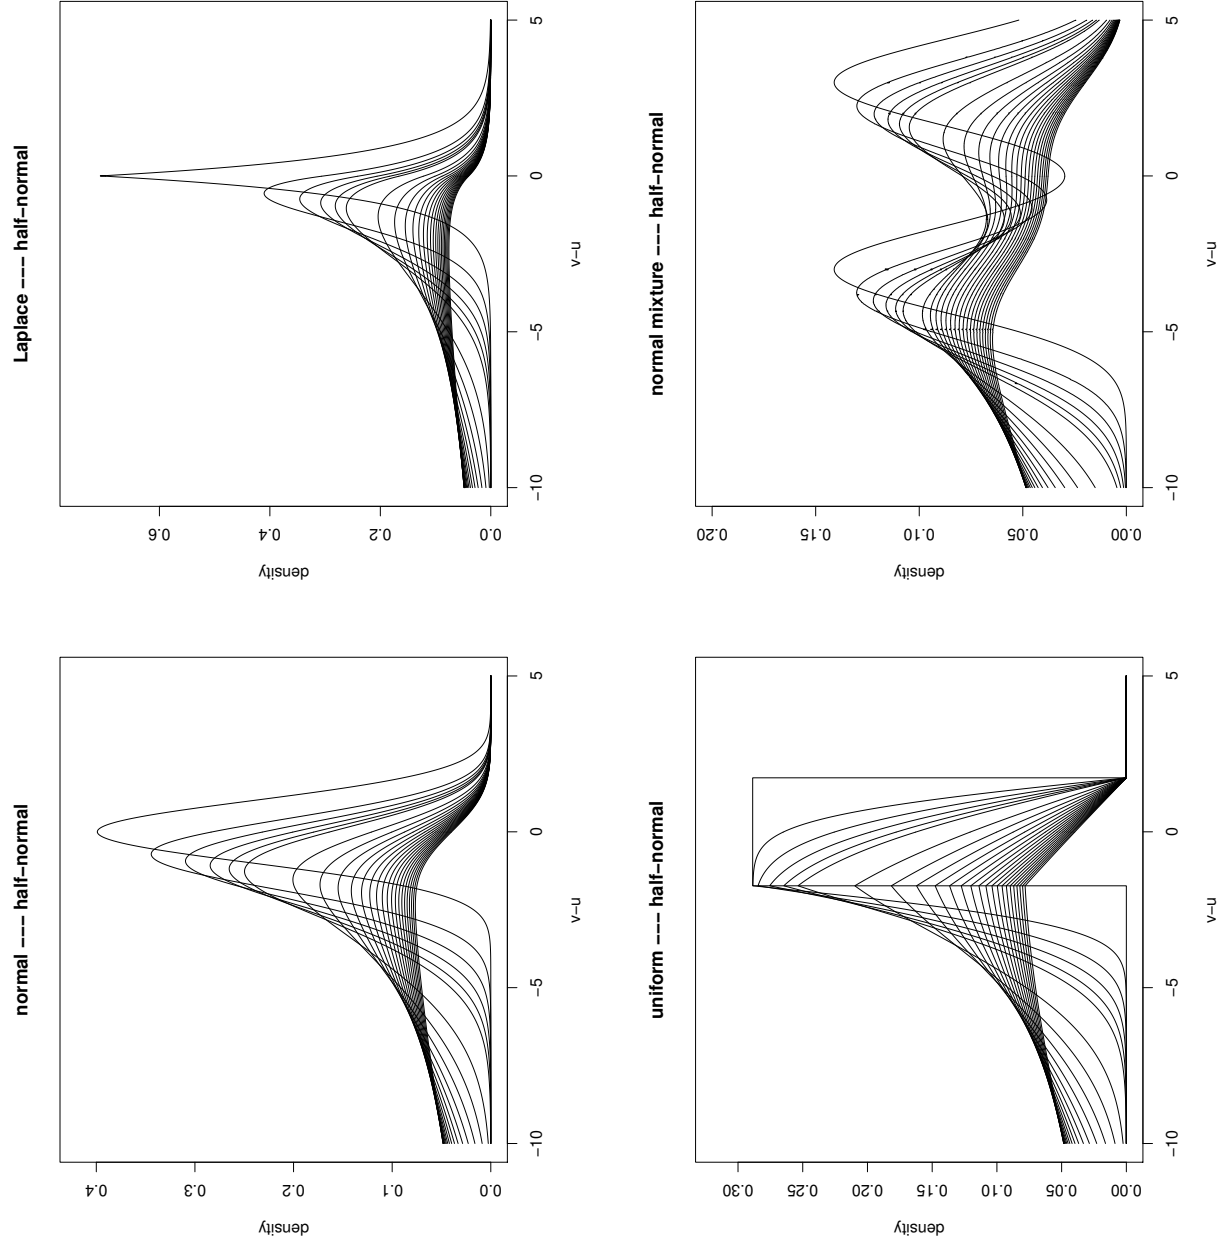

## B Handling the “Wrong Skewness” Problem

It is well-known that the convolution of the density of an unbounded, symmetrically-distributed random variable and the density of a one-sided random variable may yield finite samples that are skewed in either direction. In both the basic and transformed models discussed above, one might expect the  $\{\xi_i\}_{i=1}^n$  to be skewed to the left, but skewness to the right occurs with some probability depending on the noise-to-signal ratio  $\sqrt{\text{VAR}(\epsilon)/\text{VAR}(\eta)}$ . In samples of sizes often encountered in empirical work, and with reasonable noise-to-signal ratios, this phenomenon may occur with high probability (e.g., see Simar and Wilson, 2010, Table 1). This is sometimes called the “wrong skewness” problem, but as discussed by Simar and Wilson (2010), it can occur in the absence of any specification error or other mistakes; i.e., the problem may arise in cases there is nothing “wrong” with the model nor with anything else. In the context of our model,  $r_3(z) \leq 0$  by construction, but in finite samples, one may find  $\hat{r}_3(z) > 0$ . Since local estimation is used here, the effective sample size is of order  $n^{4/(p+q+3)}$  due to the use of bandwidths with optimal order. Hence the problem is even more serious here than in the fully-parametric context discussed by Simar and Wilson (2010).

The SVKZ estimator deals with unexpected skewness by simply truncating the estimator  $\hat{\sigma}_\eta(z)$  at zero in (3.9). Alternatively, one might consider imposing the constraint  $r_3(z) \leq 0$  in the local linear regression of the  $\hat{\xi}_i^3$  on  $Z_i$  as mentioned by SVKZ. Or, instead one might use the local exponential estimator proposed by Ziegelmann (2002). As discussed in Appendix C.2, constrained local linear estimation does not change the truncation in (3.9), but affects estimation of derivatives. As also discussed in Appendix C.2, local exponential estimation may be attractive from a theoretical viewpoint, but it loses the numerical flexibility of local linear methods and its computational burden is considerably larger than local linear methods. A third approach, adopted here, is to extend the ideas developed by HMS for fully parametric

settings to the localized framework here.<sup>1</sup>

The idea is straightforward, and we provide only a brief sketch of the idea here. Details on derivations are given in HMS. To illustrate, we maintain the local half-normal specification for the distribution of the inefficiency. Let  $k_j$  denote the  $j$ th raw moment of the reference density  $N^+(0, 1)$ . We have

$$E[(\eta - \mu_\eta(z))^3 | z] = a_3^+ \gamma^3(z) > 0 \quad (\text{B.1})$$

where  $a_3^+ = k_3 - 3k_1k_2 + 2k_1^3$ . In the “regular” case,  $\gamma(z) = \sigma_\eta(z) > 0$  and the skewness of  $\eta | z$  is positive. Denote the density of  $\eta | z$  in this case by  $h^+(\eta | z) = \frac{1}{\gamma(z)} \tilde{h}^+\left(\frac{\eta}{\gamma(z)}\right)$ .

Now consider the density  $h^-(\eta | z)$  with support on  $\mathbb{R}_+$  having the same mean as  $h^+$ , but with negative skewness. This is obtained by reflecting the density  $h^+$  around zero, shifting so that the support lies in  $\mathbb{R}_+$ , and then truncating on the right so that the resulting density has the same mean as  $h^+$ . This yields

$$h^-(\eta | z) = \frac{1}{|\gamma(z)|} \tilde{h}^-\left(\frac{\eta}{|\gamma(z)|}\right), \quad (\text{B.2})$$

where  $\tilde{h}^- \neq \tilde{h}^+$  (see HMS for an explicit expression for  $\tilde{h}^-$  and for its properties; we use only its first 3 moments). By construction, the mean given by the density  $h^-(\eta | z)$  is equal to  $\mu_\eta(z) \geq 0$  (same mean as  $h^+(\eta | z)$ ), and so

$$E[(\eta - \mu_\eta(z))^3 | z] = a_3^- \gamma^3(z) < 0, \quad (\text{B.3})$$

where  $\gamma(z) < 0$  and  $\sigma_\eta(z) = |\gamma(z)| > 0$ . For the half-normal family,  $a_3^+ = \sqrt{2/\pi}((4 - \pi)/\pi)$  and  $a_3^- \approx 0.016741474$  (again, see HMS for further details).

Adapting equations (37)–(38) in HMS to our local version, we have

$$\hat{\sigma}_\eta(z) = \begin{cases} \left[-\frac{1}{a_3^+} \hat{r}_3(z)\right]^{1/3} & \text{if } \hat{r}_3(z) \leq 0; \\ \left[\frac{1}{a_3^-} \hat{r}_3(z)\right]^{1/3} & \text{otherwise.} \end{cases} \quad (\text{B.4})$$

---

<sup>1</sup>Of course, the “wrong skewness” problems goes away asymptotically, but empirical researchers are typically confronted with samples of fixed sizes. All three methods mentioned here are asymptotically equivalent, since the unexpected skewness disappears with probability one as  $n \rightarrow \infty$ , but they may differ in finite samples.



Asymptotically, one should expect  $\hat{r}_3(z) \leq 0$ , so the asymptotic properties are the same as for the SVKZ estimator. But in finite samples, the HMS estimator in (B.4) avoids excessive numbers of estimates equal to zero.

Similarly, if an estimator of the variance of  $\epsilon$  is required, using the half-normal family for the inefficiency term we have

$$\hat{\sigma}_\epsilon^2(z) = \begin{cases} \max [0, \hat{r}_2(z) - a_2^+ \hat{\sigma}_\eta^2(z)] & \text{if } \hat{r}_3(z) \leq 0; \\ \max [0, \hat{r}_2(z) - a_2^- \hat{\sigma}_\eta^2(z)] & \text{otherwise,} \end{cases} \quad (\text{B.5})$$

where  $a_2^+ = (\pi - 2)/\pi$  and  $a_2^- \approx 0.14471441$  (see HMS for details of derivations). Here, the estimator of  $\hat{\sigma}_\epsilon^2$  is truncated at zero but our experience with Monte Carlo experiments suggests this will rarely be needed.<sup>2</sup>

---

<sup>2</sup>Without truncation, negative estimates of  $\sigma_\epsilon^2$  can occur when the residuals  $\hat{\epsilon}_i$  have skewness greater than the maximum skewness that is possible with the convolution of normal and half-normal random variables. Olson et al. (1980) refer to this as “type-II failure” in the context of corrected ordinary least squares. See Papadopoulos and Parmeter (2021) for discussion.

# C Alternative Approaches for Dealing with Unexpected Skewness

## C.1 Sign-Constrained Local Linear Least Squares

The method is briefly mentioned in Remark 2.2 in SVKZ, where the authors suggest first computing the ordinary, local-linear least squares (LLLS) nonparametric estimator  $\hat{r}_3(z)$  of  $r_3(z)$ . If the resulting estimate has the wrong sign (i.e., if  $\hat{r}_3(z) > 0$ ), then a new, constrained LLLS estimate can be computed while imposing the constraint  $r_3(z) \leq 0$  in a constrained optimization problem. We can use the same idea here, but we show that the constrained optimization problem can be easily solved by adapting results from Liew (1976) derived for parametric linear least squares.

Consider the LLLS estimator of the mean regression function  $m(z) = \mathbb{E}(\zeta|Z = z)$  for a univariate response  $\zeta$  and where  $z$  has dimension  $(r - 1)$ . Here,  $\zeta_i = \hat{\varepsilon}_i^3$  for estimating  $r_3(z)$ , but it could also be  $\hat{\varepsilon}_i^2$  for estimating  $r_2(z)$ .

It is well known (see Fan and Gijbels, 1996, Section 7.8) that LLLS estimator can be written as

$$\hat{\beta} = (\mathcal{Z}_D' \mathcal{W} \mathcal{Z}_D)^{-1} \mathcal{Z}_D' \mathcal{W} \mathcal{Y}, \quad (\text{C.1})$$

where  $\mathcal{Y} = (\zeta_1, \dots, \zeta_n)'$ ,  $\mathcal{Z}_D = [i_n \quad (\mathcal{Z} - i_n z)']$  where  $\mathcal{Z} = (Z_1, \dots, Z_n)'$  and the usual weights matrix is  $\mathcal{W} = \text{diag}(K_h(Z_i - z))$ . The LLLS estimator

$$\hat{\beta} = \arg \min_{\beta} (\mathcal{Y} - \mathcal{Z}_D \beta)' \mathcal{W} (\mathcal{Y} - \mathcal{Z}_D \beta) \quad (\text{C.2})$$

is the solution of a weighted least squares problem, and

$$\hat{m}(z) = \hat{\beta}_1 \quad (\text{C.3})$$

and

$$\widehat{\frac{\partial m}{\partial z_j}}(z) = \hat{\beta}_{j+1} \quad (\text{C.4})$$

for  $j = 1, \dots, r - 1$ .

Following the arguments in Liew (1976), it can be shown that the solution of the weighted least squares problem under the constraint that  $\beta_1 \leq 0$ , when the constraint is binding, is given by the simple expression

$$\hat{\beta}_C = \hat{\beta} - A_1 \hat{\beta}_1 / a_1, \quad (\text{C.5})$$

where  $A_1$  is the first column of the matrix  $(\mathcal{Z}'_D \mathcal{W} \mathcal{Z}_D)^{-1}$  and  $a_1$  is the first element of  $A_1$ . It can be shown that the same correction is valid for the case of the constraint  $\beta_1 \geq 0$ , when the latter is binding.

Another approach is to impose observation-specific bounds along the lines of Hall and Huang (2001) or Du et al. (2016). For instance, when estimating the variance  $\sigma_\epsilon^2(Z_i)$ , for observation  $i$ , one could impose the constraint

$$\hat{r}_2(Z_i) \geq \begin{cases} a_2^+ \hat{\sigma}_\eta^2(Z_i) > 0 & \text{if } \hat{r}_3(Z_i) \leq 0; \\ a_2^- \hat{\sigma}_\eta^2(Z_i) > 0 & \text{otherwise} \end{cases}$$

in order to ensure that  $\hat{\sigma}_\epsilon^2(Z_i) > 0$ . However, this would involve high-dimensional nonlinear optimization. In our simulations, we prefer to use the simple estimator defined in (B.5) due to their numerical simplicity. In our empirical application, where we have almost a half-million observations, imposing observation-specific bounds would be computationally formidable, even using the powerful super-computer that we use.

## C.2 Local Exponential smoothing

To be complete in our presentation, we briefly summarize the steps for obtaining the Local Exponential estimator proposed by Ziegelmann (2002) for regression models where the dependent variable is sign constrained (say positive). In our case (for the 3rd moment) it is obtained by solving

$$(\hat{\alpha}, \hat{\beta}) = \arg \min_{\alpha, \beta} \sum_{i=1}^n \left\{ [-\hat{\epsilon}_i^3] - \exp[\alpha + \beta'(Z_i - z)] \right\}^2 K_h(Z_i - z) \quad (\text{C.6})$$

for a given  $z$ . Then we have  $\hat{r}_3(z) = -\exp(\hat{\alpha}) \leq 0$ . Ziegelmann shows that this estimator asymptotic properties similar to those of the usual local linear estimator. However, the numerical burden of the local exponential estimator is large, and numerical instabilities may arise due to the exponential transformation in (C.6). In practice, to eliminate the risk of ending with local minima, several starting values should be tried. We conducted some initial Monte Carlo experiments using this estimator, but even using robust nonlinear optimization techniques, e.g., the Nelder and Mead (1965) simplex method, the results indicate a high degree of numerical instability, frequently yielding unreliable results and in all cases incurring large computational cost.

## D Some Alternative Approaches for Estimation

As discussed in Section 3 of the main paper, estimation by methods other than those of SVKZ and HMS could be used to estimate our transformed model. For example, one could specify the link function as a translog function of the elements of  $Z_i$ , and further specify the distribution of  $\epsilon_i \mid Z_i$  as normal and the distribution of  $\eta_i \mid Z_i$  as half-normal. If, in addition, specific functional forms are specified for  $\sigma_\epsilon(Z_i)$  and  $\sigma_\eta(Z_i)$ , the resulting fully parametric model could then be estimated by maximum likelihood. However, one or more of the required specification assumptions are likely to be wrong.<sup>3</sup>

The goal here is to avoid restrictive parametric assumptions, but this raises questions regarding identification in the sense that we wish to be able to use knowledge about the conditional density  $f(u \mid z)$  of  $U$  to recover information about triple  $\{\phi(z), f(\epsilon \mid z), f(\eta \mid z)\}$  with  $\epsilon$  and  $\eta$  being independent conditionally on  $z$ . For a given  $z$ , this amounts to a deconvolution problem since  $u = \phi(z) + \epsilon - \eta$ . So far, the discussions about identification has been in terms of the univariate dependent (output) variable case. But now, due to the change of coordinates, we have the transformed model (2.17)–(2.19) which also has a univariate dependent variable, namely  $U$ .

The results of Hall and Simar (2002) indicate that if the density of  $\eta \mid z$  is completely unspecified and the density of  $\epsilon \mid z$  is symmetric around zero, the model is not identified. For this reason, Hall and Simar (2002) consider a limiting case where the conditional variance of the noise  $\sigma_\epsilon^2(z)$  converges to zero as the sample size  $n$  increases. Under this assumption, Hall and Simar derive consistent estimators of the model. Of course this technical assumption is rather restrictive, limiting its interest for practitioners.

Kumbhakar et al. (2007) propose a different approach, wherein the conditional densities of  $\epsilon$  and  $\eta$  are specified *locally*, e.g.,  $\epsilon \mid z \sim N(0, \sigma_\epsilon^2(z))$  and  $\eta \mid z \sim N^+(0, \sigma_\eta^2(z))$ . The model

---

<sup>3</sup>While maximum likelihood estimators achieve root- $n$  convergence in fully parametric models, this only ensures rapid convergence to something that is not a feature of the true model if the model is mis-specified. Robinson (1988) refers to this as “root- $n$  inconsistency.”

is then clearly identified for each  $z$ , and the model can be estimated by local maximum likelihood. To maintain the nonparametric structure of the model, both scale functions are functional, and local polynomial approximations are used. Although the approach is appealing, estimation involves a formidable computational burden. Moreover, the local structure of the stochastic components is parametric, and asymptotic properties of the estimators rely on the specific parametric assumptions used to derive the local likelihood function.

Kneip et al. (2015) leave the inefficiency distribution unspecified, but require the noise  $\epsilon | z$  to be Gaussian with unknown variance. Under the latter assumption, they prove the model is identified. For estimation, they use quasi-likelihood approaches with histogram estimators for the density of the inefficiency  $\eta | z$ . Here again the numerical burden is significant. Daouia et al. (2020) use an alternative approach based on nonparametric estimation of the conditional survival function of  $U | Z$ , but for identification must assume that the noise follows a fully known distribution, e.g.,  $\epsilon | z \sim N(0, \sigma_\epsilon^2(z))$  where  $\sigma_\epsilon^2(z)$  is known.

More recently, Florens et al. (2020) specify a model where the noise is only assumed to be symmetric (as in our specification) and a flexible parametric density is chosen for the inefficiency. They also investigate identification issues (see their Section 2) and prove that if the density of  $\eta | z$  is completely specified by its odd cumulants of order larger than 3, then the model is identified. This is a sufficient condition for identification when the noise is symmetric.

## E Some Extensions

### E.1 The Cases of Hyperbolic and Radial Distances

The directional distance function defined in (2.3) is *additive* in the sense that for a given point  $(x, y) \in \Psi$ , subtracting  $\delta(x, y \mid d)d_x$  from  $x$  and adding  $\delta(x, y \mid d)d_y$  to  $y$  projects  $(x, y)$  onto  $\Psi^\partial$  in the direction  $d = (-d'_x, d_y)$ . Alternatively, one might be interested in the Farrell hyperbolic measure of efficiency

$$\gamma(x, y) := \inf \{ \gamma \mid (\gamma x, \gamma^{-1} y) \in \Psi \} \quad (\text{E.1})$$

described by Färe et al. (1985). The methods described above can easily be adapted to estimate such measures by working with logs of  $(X_i, Y_i)$  provided all of the input-output data are strictly positive.. Analogous to (2.4), we can write

$$\begin{bmatrix} \log X_i \\ \log Y_i \end{bmatrix} = \begin{bmatrix} \log X_i^\partial \\ \log Y_i^\partial \end{bmatrix} + \begin{bmatrix} -(\epsilon_i - \eta_i)i_p \\ (\epsilon_i - \eta_i)i_q \end{bmatrix} \quad (\text{E.2})$$

where  $\epsilon_i$  and  $\eta_i$  are as in Assumption 2.4. In the absence of noise, we have  $\eta_i = \log \gamma(X_i, Y_i) \geq 0$ , but noise can be accommodated exactly as before.

Alternatively, one might consider the Farrell (1957) output measure of efficiency given by

$$\lambda(x, y) := \sup \{ \lambda \mid (x, \lambda y) \in \Psi \}. \quad (\text{E.3})$$

Estimates can be obtained similarly using  $d = (0'_p, i'_q)'$  and logged data. In the absence of noise, we have  $\eta_i = \log \lambda(x, y)$ , but noise can be allowed for as before. Yet another alternative is the Farrell (1957) input measure given by

$$\theta(x, y) := \inf \{ \theta \mid (\theta x, y) \in \Psi \}. \quad (\text{E.4})$$

This can be estimated by setting  $d = (-i'_p, 0'_q)'$  and again using logged data, leading to  $\eta_i = \log \theta(x, y)$  in the absence of noise.

Note that the links between additive, directional efficiency and the radial hyperbolic, input and output efficiencies discussed here involve use of direction vectors that consist of 0s and 1s. Consequently, the direction vector should not be normalized to have length  $\|d\| = 1$ .

## E.2 Introducing Exogenous Environmental Variables

The models developed in Sections 2.2 and 2.3 can be easily extended to accommodate environmental variables  $E_i$  that may influence either the frontier levels  $W_i^\partial$  or characteristics of the components of  $\xi_i$ . Conditioning the frontier points  $W_i^\partial$  on the  $E_i$  leads to  $W_i^\partial(E_i) = (X_i^\partial(E_i), Y_i^\partial(E_i))$ , and as a consequence the scale functions  $\tilde{\sigma}_\epsilon$  and  $\tilde{\sigma}_\eta$  must also be conditioned on the  $E_i$ . This amounts to replacing (2.17)–(2.19) with the conditional transformed model

$$U_i = \phi(Z_i, E_i) + \|d\|\epsilon_i - \|d\|\eta_i \quad (\text{E.5})$$

where  $\epsilon_i \mid Z_i, E_i \sim \text{Sym}(0, \sigma_\epsilon^2(Z_i, E_i))$  and  $\eta_i \mid Z_i, E_i \sim D_+(\sigma_\eta(Z_i, E_i))$ .

This is sufficient to allow one to disentangle the role of  $E$  on the frontier level as well as on the inefficiency distribution, thereby avoiding restrictive assumptions that are often made in the case of no noise (see Simar and Wilson, 2007 for discussion). For estimation, one can condition everywhere on not just  $Z_i$  but instead  $(Z_i, E_i)$  and follow the route outlined above in Section 3. All of the results remain valid with the exception of the rate of convergence, which is slower when environmental variables are present. For  $E \in \mathbb{R}^s$ , the optimal rate is  $n^{2/(p+q+s+3)}$ , which makes clear that including environmental variables exacerbates the curse of dimensionality, leading to perhaps imprecise estimates unless  $n$  is large.

## E.3 Stochastic Versions of FDH/DEA-Type Estimators

Both the SVKZ and HMS estimators discussed in Section 3 can be extended to impose assumptions of free disposability or convexity of the production set  $\Psi$ . It is sufficient to apply the FDH estimator (to impose free disposability) or the DEA estimator (to impose both free



disposability and convexity) to the estimated frontier points  $\widehat{W}_i^\partial$  obtained with either the SVKZ or HMS estimator as discussed above in Section 3. This amounts to a regularization step, as discussed Simar and Zelenyuk (2011). The usual convergence rates of the FDH and DEA estimators are  $n^{1/(p+q)}$  and  $n^{2/(p+q+1)}$ , respectively, but here the rates can be improved.

To achieve this, frontier points on a grid of values  $\{z_k\}_{k=1}^{K_n}$  should be estimated using the methods described in Section 3, with  $K_n$  large enough to control the size of the error of the regularization. For instance, if the FDH estimator is applied on these  $K_n$  points, the rate of error in the FDH regularization step is  $K_n^{1/(p+q)}$ . Hence, in order to obtain a free-disposal estimator of  $\Psi$  keeping the same properties as the initial, un-regularized estimator, one should select  $K_n > n^{2(p+q)/(p+q+3)}$ . Alternatively, if the DEA estimator is used, one should choose  $K_n > n^{(p+q+1)/(p+q+3)}$  for the regularization step.

## E.4 Data-Driven Direction

As observed following Assumption 2.2 in Section 2.2, the stochastic element  $\xi_i$  operates on frontier points in the direction  $d$ , and changing the direction vector results in a different model. Nonetheless, some papers allow the direction vector  $d$  to be determined by data according to some criterion function which is then optimized. Examples include Vardanyan and Noh (2006); Atkinson and Tsionas (2016); Färe et al. (2017); and Layer et al. (2020) among others.

In some papers, the criterion involves minimizing inefficiency across firms in the sample, as in Färe et al. (2017). In others, the direction is optimized to be consistent with desirable economic behavior such as cost minimization or some other behavior, as in Atkinson and Tsionas (2016). In the latter case, whether firms minimize cost or some other economic criterion is an empirical question, and as such should be tested.

The former case, where direction is chosen to minimize some aggregate measure of inefficiency, is even more problematic. Inefficiency is not *noise* in our model; instead, it is the

*signal*, and the signal is potentially contaminated by noise. Choosing the direction vector  $d$  to minimize, for example,  $\sum_{i=1}^n \xi_i^2$  would minimize not only the noise, but also the signal, and we see no reason why this is sensible. Moreover, this would make both the two-sided noise term  $\epsilon_i$  and the one-sided inefficiency term  $\eta_i$  dependent on  $d$ , resulting in some uncertainty about the properties of estimators such as the ones we use. In addition, it is not clear what the underlying DGP might be or how one would simulate data from such a model. As such, the model would be incoherent. Allowing the choice of direction to be data-driven along the lines of Atkinson and Tsionas (2016) or Färe et al. (2017) require substantially more parametric structure than we impose in our model.

In many cases, researchers use a fixed direction vector with directions given by the medians or means of the corresponding input and output variables. It is important to note that if the directions are not given in the same units as the corresponding variables, estimated distances will depend on units of measurement. This is well-known.

## F Monte Carlo Evidence

### F.1 Experimental Framework

Here we describe results from a series of Monte Carlo experiments to gain insight on how well our estimation approach works in terms of recovering information about the true, underlying model. We consider various sample sizes  $n$  and various numbers of inputs ( $p$ ) and outputs ( $q$ ). We also consider various noise-to-signal ratios.

In order to simulate a frontier  $\Psi^\partial$  in settings with multiple inputs and multiple outputs, consider a sphere of radius one centered at the origin in  $\mathbb{R}^{p+q}$ . Then reflect the negative part of the  $q$  output axes and the positive part of the  $p$  input axes around the origin so that only  $1/2^{p+q}$  of the sphere lying in  $\mathbb{R}_-^p \times \mathbb{R}_+^q$  remains. Then shift the remaining surface along the  $p$  input axes in the positive direction by one unit so that the frontier  $\Psi^\partial$  lies in  $\mathbb{R}_+^{p+q}$ . In two dimensions with  $p = q = 1$ , this results in a frontier corresponding to the upper-left, northwest quarter of a circle centered at  $(1, 0)$ .

In each experiment, for given values of  $p$  and  $q$ , we first use the method of Muller (1959) and Marsaglia (1972) to draw  $(p + q)$ -tuples  $a_i = (a_{p,i}, a_{q,i})$  uniformly distributed on the surface of a closed  $(p + q)$ -ball centered at the origin with radius one for  $i = 1, \dots, n$ . The draws are independent, so that  $a_i \perp a_j$  for  $i \neq j$ . For each  $i$  we then set  $X_i^\partial = (1 - |a_{p,i}|)$  and  $Y_i^\partial = |a_{q,i}|$  to obtain efficient input-output pairs  $(X_i^\partial, Y_i^\partial)$ . For the direction vector we use  $d = \tilde{d}/\|\tilde{d}\|$  with  $\tilde{d} = [-i'_p \ i'_q]'$  where  $i_p$  and  $i_q$  are column vectors of ones with lengths  $p$  and  $q$ , respectively. We normalize  $d$  to have length equal to one, but this is not required and has no bearing on the results of our experiments.

We consider two sets of experiments. Section F.2 discusses experiments where inefficiency is distributed half-normal as in Assumption 2.5. Section F.3 discusses experiments where inefficiency is distributed exponential, but the half-normal specification in Assumption 2.5 is maintained for estimation. The second set of experiments discussed in Section F.3 serves

as a robustness check.

## F.2 Half-Normal Inefficiency

We first consider homoskedastic deviations from the frontier. We set  $\sigma_\eta = 0.5$  and draw  $\eta_i \sim N^+(0, \sigma_\eta^2)$  for each  $i = 1, \dots, n$ . For a given value of  $\rho \geq 0$ , we set

$$\sigma_\epsilon = \rho [(\pi - 2)/\pi]^{1/2} \sigma_\eta \quad (\text{F.1})$$

and then draw  $\epsilon_i \sim N(0, \sigma_\epsilon^2)$ . The value of  $\rho$  serves to control the noise-to-signal ratio, i.e., the ratio of the standard deviations of the efficiency  $\eta_i$  and the noise  $\epsilon_i$ .

Using the direction vector  $d$  to construct the rotation matrix  $R_d$  defined in (2.10), the efficient input-output pairs  $(X_i^\partial, Y_i^\partial)$  are transformed to  $(z, u)$ -space by computing  $(Z_i^\partial, U_i^\partial)$  via (2.20). We compute then construct “observed values”  $(Z_i, U_i)$  by setting  $Z_i = Z_i^\partial$  and computing  $U_i = U_i^\partial + \xi_i$  where  $\xi_i = \epsilon_i - \eta_i$ . Note that this is identical to computing “observed” values  $(X_i, Y_i)$  in  $(x, y)$ -space from the  $(X_i^\partial, Y_i^\partial)$  using (2.4) and then computing the  $(Z_i, U_i)$  using (2.11).

In each set of experiments, we consider sample sizes  $n \in \{100, 200, 400, 800, 1600, 3200, 6400\}$  and noise-to-signal ratios  $\rho \in \{0.0, 0.25, 0.50, 0.75, 1.0, 2.0\}$ . In addition, we consider settings with two to six dimensions with  $(p, q) \in \{(1, 1), (1, 2), (2, 2), (2, 3), (3, 3)\}$ . Each experiment with fixed values of  $n$ ,  $\rho$  and  $(p, q)$  consists of 1,000 Monte Carlo trials. For our first set of experiments, with homoskedastic noise and inefficiency, we apply both the SVKZ or HMS estimator described above to obtain two sets of estimates  $\widehat{U}_i^\partial$  of  $U_i^\partial$  for  $i = 1, \dots, n$ . For each Monte Carlo trial, we compute an estimate of integrated mean square error (IMSE) given by

$$\widehat{\text{IMSE}}_m = \sum_{i=1}^n \left( \widehat{U}_i^\partial - U_i^\partial \right)^2, \quad (\text{F.2})$$

$m = 1 \dots, 1000$  for either set of estimates. Table F.1 reports the sample means of these estimates (for both the SVKZ and HMS estimators) over the 1,000 Monte Carlo trials in

each of the resulting  $6 \times 7 \times 5 = 210$  experiments.

The results in Table F.1 indicate that for both estimators, IMSE decreases with sample size, and increases with both number of dimensions and the noise-to-signal ratio as expected. Moreover, when  $\rho \leq 1$ , the HMS estimator results in smaller IMSE than the SVKZ estimator in all but a few cases. To check whether the differences in IMSE between the two estimators are significant, IMSE for the SVKZ estimator for given value of  $n$ ,  $p$  and  $q$  is subtracted from the corresponding IMSE for the HMS estimator for each Monte Carlo trial, and this difference is divided by the square root of the variance of the differences across Monte Carlo trials divided by the number of trials. By the Lindeberg-Levy central limit theorem, the resulting quantity is approximately distributed  $N(0, 1)$ , allowing two-sided tests of significance. The differences are shown in Table F.2, with asterisks indicating significance at 90, 95 or 99 percent levels. The differences in F.2 are significant at 90-percent or better in 179 of 210 cases. In addition, all of the significant differences are negative when  $\rho \leq 1$ . For  $\rho = 2$ , the differences are positive in many cases. In all cases, the differences in Table F.2 become smaller as sample size increases. When  $\rho = 2$ , the differences eventually become negative and significant when  $n = 6400$ , except in the case with 6 dimensions.

The next round of experiments allow for heteroskedasticity in both the inefficiency as well as the noise processes. We consider the same values of the noise-to-signal ratio  $\rho$ , dimensions  $(p, q)$  and sample size  $n$  as in the previous set of experiments, We again perform 1,000 Monte Carlo trials for each experiment, and the true frontier remains the same as before. We again focus on IMSE of the frontier estimates. In these experiments, we generate efficient observations  $(X_i^\partial, Y_i^\partial)$  in  $(x, y)$ -space and transform these to efficient observations  $(Z_i, U_i^\partial)$  exactly as in the first set of experiments. But instead of drawing  $\eta_i \sim N^+(0, \sigma_\eta^2)$  as before, we draw  $\eta_i \sim N^+(0, (0.5/(1 + \exp(Z_i' \alpha)) + c_{pq})^2)$  where  $\alpha$  is an  $(r \times 1)$  vector of coefficients equal to 1 and  $c_{pq}$  is a constant depending on  $p$  and  $q$  as described below. Hence the mean and variance of  $\eta_i$  is made to depend on the elements of  $Z_i$ , and hence

on all of the inputs and outputs in  $(x, y)$ -space. Similarly, for the noise we draw  $\epsilon_i \sim N(0, (0.75 + (0.5/(1 + Z_1\alpha)^2)\sigma_\epsilon^2)$ .

To facilitate comparison of results from these experiments comparable with the results with no heteroskedasticity in Table F.1, for each pair  $(p, q)$  we first estimate the expectation of the factor  $0.5/(1 + \exp(Z_i\alpha))$  by simulating one billion draws of efficient input-output pairs  $(X_i^\partial, Y_i^\partial)$ , transforming these to  $(Z_i, U_i^\partial)$  by multiplying by the rotation matrix  $R_d$ , and then computing the sample mean of the values  $0.5/(1 + \exp(Z_1\alpha))$ ,  $i = 1, \dots, 10^9$ . We then subtract this mean from 0.5, and use the resulting value for  $\sigma_\eta$ . This yields values  $c_{pq} = 0.1684, 0.1288, 0.1056, 0.0747$  and  $0.0611$  corresponding to  $(p, q) = (1, 1), (1, 2), (2, 2), (2, 3)$  and  $(3, 3)$ , respectively, ensuring that  $\mathbb{E}(\sigma_\eta(Z_i))$  is approximately 0.5 in each case. We then let  $\sigma_\epsilon$  be determined by  $\rho$  as in (F.1). Finally, we use the draws of  $\eta_i$  and  $\epsilon_i$  to construct “observed” data  $(X_i, Y_i)$  and  $(Z_i, U_i)$  as before.

Table F.3 shows our Monte Carlo estimates of IMSE for frontier estimates under heteroskedastic inefficiency and noise. Overall, we find the same patterns as before: for both estimators, IMSE decreases with increasing sample size, and increases with number of dimensions and with the noise-to-signal ratio  $\rho$ . Analogous to Table F.2, Table F.4 shows differences between average IMSE for the SVKZ and HMS estimators from Table F.3. The results indicate that the HMS estimator has significantly smaller IMSE than the SVKZ estimator in all but 15 of the 175 cases represented in Table F.3 where  $\rho \leq 1$ . Among these 15 cases, there are none where IMSE for the SVKZ estimator is significantly less than that for the HMS estimator. When  $\rho = 2.0$ , the IMSE estimator yields significantly smaller IMSE on average than the HMS estimator in 29 of 35 cases.

Comparing the results with heteroskedasticity in Table F.3 with the corresponding results in Table F.1 where there is no heteroskedasticity, we find mixed results. Table F.5 gives differences in average IMSE between Tables F.3 and F.1 for the SVKZ estimator, with positive signs indicating that IMSE is larger when there is no heteroskedasticity. Table F.6

gives similar differences for the HMS estimator. The results in both tables F.5 and F.6 indicate that some of the differences are statistically significant, but are numerically small.

Using the same experiments to produce the results in Tables F.1 and F.3, we also examine error in estimation of derivatives of expected inefficiency with respect to inputs and outputs in the original  $(x, y)$ -space. In our experiments, we consider marginal effects at a fixed point  $(x, y)$  on the frontier with the  $p$  elements of  $x$  determined by the median input level (which is the same for each of  $p$  dimensions) and the  $q$  elements of  $y$  equal to  $[1 - (x - 1)'(x - 1)]^{1/2}$ .

From (3.5) we have

$$\frac{\partial \mu_\eta(z)}{\partial z} = \sqrt{\frac{2}{\pi}} \frac{\partial \sigma_\eta(z)}{\partial z}. \quad (\text{F.3})$$

For the SVKZ estimator of  $\sigma_\eta(z)$  given in (3.9), we have

$$\frac{\partial \hat{\sigma}_\eta(z)}{\partial z} = \begin{cases} \frac{1}{3} \left(\frac{\pi}{2}\right)^{1/2} \left(\frac{\pi}{\pi-4}\right) \left[\left(\frac{\pi}{2}\right)^{1/2} \left(\frac{\pi i}{\pi-4}\right) \hat{r}_3(z)\right]^{-2/3} \frac{\partial \hat{r}_3(z)}{\partial z} & \text{if } \hat{r}_3(z) \leq 0; \\ 0 & \text{otherwise.} \end{cases} \quad (\text{F.4})$$

For the HMS estimator of  $\sigma_\eta(z)$  given in (B.4), we have

$$\frac{\partial \hat{\sigma}_\eta(z)}{\partial z} = \begin{cases} -\left(\frac{1}{3a_3^+}\right) \left[-\frac{1}{a_3^+} \hat{r}_3(z)\right]^{-2/3} \frac{\partial \hat{r}_3(z)}{\partial z} & \text{if } \hat{r}_3(z) \leq 0; \\ \left(\frac{1}{3a_3^-}\right) \left[\frac{1}{a_3^-} \hat{r}_3(z)\right]^{-2/3} \frac{\partial \hat{r}_3(z)}{\partial z} & \text{otherwise.} \end{cases} \quad (\text{F.5})$$

Estimates  $\hat{r}_3(z)$  and  $\partial \hat{r}_3(z)/\partial z$  are obtained by LLLS estimation in the regression of cubed residuals  $\hat{\xi}_i$  on  $Z_i$  as discussed above in Section 3. Substituting these estimates into (F.3) and (F.5) give SVKZ and HMS estimates  $\partial \hat{\sigma}_\eta(z)/\partial z$ , and substituting these into (2.32) give SVKZ and HMS estimates of the partial of expected inefficiency with respect to inputs and outputs in the original  $(x, y)$ -space.

In each experiment, on each of 1,000 Monte Carlo trials, we compute  $(p + q)$  estimates  $\hat{\mu}_\eta(w^\partial)/\partial w^\partial$ , using either the SVKZ or HMS estimators, and then we compute the average squared error  $\frac{1}{p+q} \left( \frac{\partial \hat{\mu}_\eta(w^\partial)}{\partial w^\partial} - \frac{\partial \mu_\eta(w^\partial)}{\partial w^\partial} \right)' \left( \frac{\partial \hat{\mu}_\eta(w^\partial)}{\partial w^\partial} - \frac{\partial \mu_\eta(w^\partial)}{\partial w^\partial} \right)$ . Table F.7 reports medians of these average squared errors for each of our 210 Monte Carlo experiments.<sup>4</sup> The results

---

<sup>4</sup>Estimation of derivatives is necessarily more difficult than estimation of conditional means. Among 1,000

in Table F.7 are similar in magnitude to those in Tables F.1–F.3. As expected, squared error increases with increasing dimensionality, and diminishes with increasing sample size, although this effect is small when  $p = q = 1$ .

To examine marginal products, we consider the same fixed point as in the previous exercise. Recalling the discussion at the beginning of Section F, note that a point  $(x, y)$  on the frontier must satisfy  $(x - 1)'(x - 1) + y'y = 1$ . For a fixed point  $(x, y)$  and  $j \neq k$ , there are  $pq$  distinct marginal products  $\frac{\partial y^k}{\partial x^j} = (1 - x^j)/y^k$ , where  $x^j$  and  $y^k$  denote the  $j$ th and  $k$ th elements of  $x$  and  $y$ , respectively. To obtain estimates of marginal products, recall that estimates of  $\partial\phi(z)/\partial z$  can be obtained as discussed in Section 3.1, and these can be used to estimate the Jacobian matrix in (2.24). Substituting estimates of the Jacobian into (2.28) and solving for the  $r$ -vector  $c$  allows marginal products to be estimated using (2.29).

On each Monte Carlo trial, we compute  $pq$  marginal products using either the SVKZ or HMS estimators, subtract the corresponding true values, and then compute the sum of squares of the resulting differences divided by  $(p \times q)$ . Table F.8 reports median average squared errors across 1,000 Monte Carlo trials for each of our 210 experiments, analogous to Table F.7. The medians in Table F.8 are necessarily larger than the corresponding values in Table F.7 due to the fact that  $\hat{r}_1(z)$  is added to  $\hat{\mu}_z(z)$  to obtain the frontier estimate  $\hat{\phi}(z)$  in (3.12). Nonetheless, the squared errors in Table F.8 are numerically small provided the number of dimensions is not too large.

### F.3 Exponential Inefficiency

In order to check the robustness of our simulation results, we repeat both rounds of experiments described above in Section F.2, replacing the half-normal distribution for inefficiency with an exponential distribution when simulating data, but maintaining As-

---

Monte Carlo trials, we sometimes find in a hand-full of cases derivative estimates that are implausibly large; in other words, the distribution of our squared errors across 1,000 trials is skewed to the right. Consequently, we report medians in Table F.7 to provide a more robust, stable measure than would be provided by the mean of the squared errors.



sumption 2.5 for purposes of estimation. One should expect to pay a price in terms of estimation error for mis-specifying the inefficiency process, but due to our local estimation, the results indicate the price is small as shown below.

In the first group of experiments, both inefficiency and noise are homoskedastic as in Section F.2. For each  $i = 1, \dots, n$  we draw  $\eta_i$  from the exponential density  $f(\eta | \omega) = \omega \exp(-\omega\eta)$  instead of the half-normal distribution  $N^+(0, \sigma_\eta^2)$  used in Section F.2. In order to facilitate comparison with the results in Table F.1, we set  $\omega = \sqrt{\pi}(\sqrt{2}\sigma_\eta)^{-1}$ , with  $\sigma_\eta = 0.5$  as before, so that the exponential inefficiencies have the same mean as the half-normal inefficiencies in Section F.2. For the same values of  $\rho$  as in Section F.2, we then set  $\sigma_\epsilon = \rho\sigma_\eta\sqrt{2}/\sqrt{\pi}$  and draw  $\epsilon_i$  from  $N(0, \sigma_\epsilon^2)$  for each  $i = 1, \dots, n$ . As in Section F.2,  $\rho$  controls the noise-to-signal ratio in terms of the ratios of standard deviations of the noise and the inefficiency processes.

In the second group of experiments, both inefficiency and noise are heteroskedastic, exponentially-distributed. For each  $i = 1, \dots, n$ , we compute  $\sigma_\eta(Z_i) = (0.5/(1+\exp(Z_i\alpha)) + c_{p,q})$  and  $\sigma_\epsilon(Z_i) = \rho\sigma_\eta(Z_i)\sqrt{2}/\sqrt{\pi}$  with  $\rho$  controlling the noise-to-signal ratio as before. The constants  $c_{p,q}$  are described in Section F.2 of the paper, and ensure that the expectation of  $\sigma_\eta(Z_i)$  equals 0.5 to facilitate comparison with the results in Tables F.1 and F.9. We then set  $\omega(Z_i) = (\sqrt{2}/\sqrt{\pi})\sigma_\eta(Z_i)$  and draw  $\eta_i$  from the exponential density with parameter  $\omega(Z_i)$ , and draw  $\epsilon_i$  from  $N(0, \sigma_\epsilon(Z_i))$ . The draws  $\eta_i$  and  $\epsilon_i$  are used to construct  $(X_i, Y_i)$  and  $(Z_i, U_i)$  as described in Section F.2.

Results from the two sets of experiments with exponentially-distributed inefficiency are shown in Tables F.9–F.12, analogous to the results from experiments with half-normal inefficiency shown in Tables F.1–F.8 in the main paper. Of course, one should expect to pay a price for mis-specification of the inefficiency process. To facilitate comparison of the experiments where inefficiency is exponential with the corresponding experiment where inefficiency is half-normal, Tables F.13–F.16 show differences in IMSEs and median average square errors

between Tables F.9–F.12 (where inefficiency is distributed exponential) and Tables F.1–F.8 (where inefficiency is distributed half-normal). Negative signs in Tables F.13–F.16 indicate smaller errors with the mis-specified inefficiency, but occur only in a few cases in each table. However, while most of the differences in Tables F.13–F.16 are positive, most are also of small magnitude. For example, the median and mean values of the differences (between Tables F.9 and F.1) shown in Table F.13 are 0.0447 and 0.0593, respectively. Similarly, the median and mean values of the differences (between Tables F.10 and F.3) shown in Table F.14 are 0.0474 and 0.0629, respectively. For purposes of estimating derivatives of expected efficiency, the differences between Tables F.11 and F.7 shown in Table F.15 are even smaller, with median and mean values of 0.0247 and 0.0411, respectively. For purposes of estimating marginal products, mis-specification of the inefficiency process is less costly still—the differences between Tables F.12 and F.8 shown in Table F.16 have median and mean values of 0.0047 and  $-0.0325$  (respectively), and the differences are *negative* in 186 of 420 cases. While there is a price to pay for mis-specifying exponential inefficiency as half-normal, the results suggest that in most cases the price is not high, especially for purposes of estimating marginal products and derivatives of expected inefficiency.

**Table F.1:** IMSE for Frontier Estimates with No Heteroskedasticity

| $\rho$ | $n$  | SVKZ   |        |        |        |        | HMS    |        |        |        |        |
|--------|------|--------|--------|--------|--------|--------|--------|--------|--------|--------|--------|
|        |      | (1,1)  | (1,2)  | (2,2)  | (2,3)  | (3,3)  | (1,1)  | (1,2)  | (2,2)  | (2,3)  | (3,3)  |
| 0.00   | 100  | 0.0193 | 0.0369 | 0.0461 | 0.0548 | 0.0632 | 0.0161 | 0.0274 | 0.0344 | 0.0388 | 0.0437 |
|        | 200  | 0.0094 | 0.0227 | 0.0288 | 0.0337 | 0.0401 | 0.0082 | 0.0187 | 0.0228 | 0.0263 | 0.0293 |
|        | 400  | 0.0043 | 0.0125 | 0.0176 | 0.0205 | 0.0239 | 0.0042 | 0.0113 | 0.0153 | 0.0170 | 0.0192 |
|        | 800  | 0.0021 | 0.0067 | 0.0115 | 0.0131 | 0.0140 | 0.0021 | 0.0066 | 0.0111 | 0.0121 | 0.0125 |
|        | 1600 | 0.0011 | 0.0036 | 0.0077 | 0.0094 | 0.0098 | 0.0010 | 0.0036 | 0.0077 | 0.0092 | 0.0094 |
|        | 3200 | 0.0006 | 0.0020 | 0.0052 | 0.0073 | 0.0076 | 0.0006 | 0.0020 | 0.0051 | 0.0073 | 0.0075 |
|        | 6400 | 0.0003 | 0.0012 | 0.0033 | 0.0059 | 0.0065 | 0.0003 | 0.0012 | 0.0033 | 0.0059 | 0.0065 |
| 0.25   | 100  | 0.0221 | 0.0407 | 0.0497 | 0.0578 | 0.0668 | 0.0174 | 0.0291 | 0.0366 | 0.0409 | 0.0462 |
|        | 200  | 0.0104 | 0.0251 | 0.0322 | 0.0366 | 0.0427 | 0.0090 | 0.0199 | 0.0245 | 0.0279 | 0.0306 |
|        | 400  | 0.0050 | 0.0142 | 0.0194 | 0.0224 | 0.0263 | 0.0047 | 0.0125 | 0.0164 | 0.0180 | 0.0205 |
|        | 800  | 0.0023 | 0.0073 | 0.0126 | 0.0143 | 0.0149 | 0.0023 | 0.0072 | 0.0119 | 0.0129 | 0.0131 |
|        | 1600 | 0.0012 | 0.0040 | 0.0084 | 0.0101 | 0.0104 | 0.0012 | 0.0039 | 0.0084 | 0.0099 | 0.0099 |
|        | 3200 | 0.0006 | 0.0022 | 0.0056 | 0.0078 | 0.0081 | 0.0006 | 0.0022 | 0.0056 | 0.0078 | 0.0080 |
|        | 6400 | 0.0003 | 0.0013 | 0.0036 | 0.0063 | 0.0070 | 0.0003 | 0.0013 | 0.0036 | 0.0063 | 0.0070 |
| 0.50   | 100  | 0.0323 | 0.0516 | 0.0601 | 0.0690 | 0.0776 | 0.0216 | 0.0346 | 0.0438 | 0.0508 | 0.0558 |
|        | 200  | 0.0150 | 0.0340 | 0.0419 | 0.0459 | 0.0515 | 0.0118 | 0.0240 | 0.0293 | 0.0329 | 0.0366 |
|        | 400  | 0.0071 | 0.0204 | 0.0261 | 0.0293 | 0.0336 | 0.0063 | 0.0159 | 0.0198 | 0.0214 | 0.0250 |
|        | 800  | 0.0031 | 0.0100 | 0.0171 | 0.0185 | 0.0195 | 0.0031 | 0.0094 | 0.0147 | 0.0155 | 0.0159 |
|        | 1600 | 0.0015 | 0.0053 | 0.0110 | 0.0130 | 0.0132 | 0.0015 | 0.0052 | 0.0106 | 0.0121 | 0.0119 |
|        | 3200 | 0.0008 | 0.0029 | 0.0072 | 0.0096 | 0.0099 | 0.0008 | 0.0029 | 0.0072 | 0.0095 | 0.0097 |
|        | 6400 | 0.0004 | 0.0016 | 0.0047 | 0.0078 | 0.0083 | 0.0004 | 0.0016 | 0.0047 | 0.0078 | 0.0083 |
| 0.75   | 100  | 0.0490 | 0.0672 | 0.0755 | 0.0838 | 0.0903 | 0.0315 | 0.0503 | 0.0636 | 0.0746 | 0.0808 |
|        | 200  | 0.0257 | 0.0507 | 0.0574 | 0.0606 | 0.0663 | 0.0178 | 0.0328 | 0.0409 | 0.0471 | 0.0536 |
|        | 400  | 0.0128 | 0.0337 | 0.0396 | 0.0431 | 0.0466 | 0.0097 | 0.0216 | 0.0265 | 0.0297 | 0.0339 |
|        | 800  | 0.0053 | 0.0180 | 0.0281 | 0.0293 | 0.0300 | 0.0049 | 0.0137 | 0.0198 | 0.0210 | 0.0217 |
|        | 1600 | 0.0024 | 0.0088 | 0.0181 | 0.0204 | 0.0207 | 0.0024 | 0.0081 | 0.0153 | 0.0164 | 0.0161 |
|        | 3200 | 0.0012 | 0.0045 | 0.0112 | 0.0145 | 0.0148 | 0.0012 | 0.0045 | 0.0108 | 0.0134 | 0.0132 |
|        | 6400 | 0.0006 | 0.0025 | 0.0071 | 0.0112 | 0.0116 | 0.0006 | 0.0025 | 0.0071 | 0.0111 | 0.0113 |
| 1.00   | 100  | 0.0675 | 0.0828 | 0.0896 | 0.0986 | 0.1055 | 0.0571 | 0.0856 | 0.1057 | 0.1212 | 0.1320 |
|        | 200  | 0.0456 | 0.0691 | 0.0741 | 0.0770 | 0.0819 | 0.0303 | 0.0548 | 0.0686 | 0.0802 | 0.0883 |
|        | 400  | 0.0270 | 0.0528 | 0.0567 | 0.0602 | 0.0636 | 0.0166 | 0.0337 | 0.0408 | 0.0488 | 0.0564 |
|        | 800  | 0.0117 | 0.0357 | 0.0468 | 0.0472 | 0.0463 | 0.0088 | 0.0214 | 0.0286 | 0.0320 | 0.0342 |
|        | 1600 | 0.0047 | 0.0192 | 0.0351 | 0.0357 | 0.0352 | 0.0042 | 0.0141 | 0.0222 | 0.0232 | 0.0238 |
|        | 3200 | 0.0022 | 0.0090 | 0.0227 | 0.0270 | 0.0272 | 0.0022 | 0.0081 | 0.0178 | 0.0196 | 0.0192 |
|        | 6400 | 0.0010 | 0.0043 | 0.0129 | 0.0200 | 0.0202 | 0.0010 | 0.0043 | 0.0123 | 0.0174 | 0.0168 |
| 2.00   | 100  | 0.1262 | 0.1416 | 0.1542 | 0.1691 | 0.1783 | 0.4107 | 0.4885 | 0.5573 | 0.5886 | 0.6284 |
|        | 200  | 0.1079 | 0.1217 | 0.1317 | 0.1368 | 0.1435 | 0.2902 | 0.3862 | 0.4266 | 0.4731 | 0.4924 |
|        | 400  | 0.0941 | 0.1087 | 0.1107 | 0.1164 | 0.1207 | 0.1980 | 0.2651 | 0.2907 | 0.3482 | 0.3780 |
|        | 800  | 0.0811 | 0.1031 | 0.1045 | 0.1060 | 0.1052 | 0.1195 | 0.2014 | 0.2294 | 0.2542 | 0.2745 |
|        | 1600 | 0.0669 | 0.1030 | 0.1041 | 0.0976 | 0.0941 | 0.0662 | 0.1474 | 0.1722 | 0.1728 | 0.1898 |
|        | 3200 | 0.0431 | 0.0978 | 0.1085 | 0.0990 | 0.0944 | 0.0300 | 0.0959 | 0.1302 | 0.1298 | 0.1387 |
|        | 6400 | 0.0227 | 0.0820 | 0.1168 | 0.1093 | 0.0967 | 0.0134 | 0.0538 | 0.1018 | 0.1051 | 0.0985 |

**Table F.2:** Differences in IMSE, HMS versus SVKZ, No Heteroskedasticity

| $\rho$ | $n$  | (1,1)        | (1,2)        | (2,2)        | (2,3)        | (3,3)        |
|--------|------|--------------|--------------|--------------|--------------|--------------|
| 0.00   | 100  | -0.003244*** | -0.009575*** | -0.011749*** | -0.016052*** | -0.019432*** |
|        | 200  | -0.001154*** | -0.004065*** | -0.005942*** | -0.007412*** | -0.010825*** |
|        | 400  | -0.000105*** | -0.001175*** | -0.002346*** | -0.003520*** | -0.004755*** |
|        | 800  | 0.000000     | -0.000128*** | -0.000441*** | -0.001049*** | -0.001549*** |
|        | 1600 | -0.000002    | -0.000001    | -0.000055*** | -0.000177*** | -0.000423*** |
|        | 3200 | 0.000000     | 0.000000     | -0.000004    | -0.000018*** | -0.000060*** |
|        | 6400 | 0.000000     | 0.000000     | -0.000001    | -0.000001*   | -0.000012**  |
| 0.25   | 100  | -0.004672*** | -0.011608*** | -0.013121*** | -0.016972*** | -0.020602*** |
|        | 200  | -0.001361*** | -0.005174*** | -0.007784*** | -0.008741*** | -0.012084*** |
|        | 400  | -0.000270*** | -0.001723*** | -0.002976*** | -0.004444*** | -0.005807*** |
|        | 800  | -0.000014    | -0.000158*** | -0.000699*** | -0.001375*** | -0.001788*** |
|        | 1600 | -0.000006    | -0.000013*   | -0.000094*** | -0.000253*** | -0.000493*** |
|        | 3200 | 0.000000     | 0.000000     | -0.000002    | -0.000015*** | -0.000076*** |
|        | 6400 | 0.000000     | 0.000000     | -0.000002    | -0.000001**  | -0.000018**  |
| 0.50   | 100  | -0.010666*** | -0.016970*** | -0.016289*** | -0.018240*** | -0.021777*** |
|        | 200  | -0.003191*** | -0.009998*** | -0.012592*** | -0.013073*** | -0.014949*** |
|        | 400  | -0.000742*** | -0.004500*** | -0.006288*** | -0.007929*** | -0.008649*** |
|        | 800  | -0.000057**  | -0.000672*** | -0.002367*** | -0.002985*** | -0.003615*** |
|        | 1600 | -0.000009    | -0.000079*** | -0.000413*** | -0.000833*** | -0.001323*** |
|        | 3200 | 0.000000     | -0.000001    | -0.000020*** | -0.000088*** | -0.000241*** |
|        | 6400 | 0.000000     | 0.000000     | 0.000000     | -0.000017*   | -0.000042*** |
| 0.75   | 100  | -0.017536*** | -0.016928*** | -0.011953*** | -0.009232*** | -0.009488*** |
|        | 200  | -0.007948*** | -0.017874*** | -0.016524*** | -0.013497*** | -0.012658*** |
|        | 400  | -0.003082*** | -0.012089*** | -0.013062*** | -0.013429*** | -0.012683*** |
|        | 800  | -0.000345*** | -0.004297*** | -0.008249*** | -0.008294*** | -0.008326*** |
|        | 1600 | -0.000043*** | -0.000674*** | -0.002811*** | -0.004056*** | -0.004561*** |
|        | 3200 | 0.000000     | -0.000015**  | -0.000366*** | -0.001110*** | -0.001606*** |
|        | 6400 | 0.000000     | 0.000000     | -0.000007*** | -0.000177*** | -0.000359*** |
| 1.00   | 100  | -0.010354*** | 0.002823     | 0.016089***  | 0.022600***  | 0.026479***  |
|        | 200  | -0.015329*** | -0.014297*** | -0.005488*** | 0.003168**   | 0.006327***  |
|        | 400  | -0.010336*** | -0.019091*** | -0.015948*** | -0.011386*** | -0.007143*** |
|        | 800  | -0.002917*** | -0.014280*** | -0.018196*** | -0.015210*** | -0.012096*** |
|        | 1600 | -0.000456*** | -0.005124*** | -0.012921*** | -0.012535*** | -0.011378*** |
|        | 3200 | -0.000003    | -0.000839*** | -0.004972*** | -0.007344*** | -0.008035*** |
|        | 6400 | 0.000000     | -0.000027*** | -0.000634*** | -0.002547*** | -0.003389*** |
| 2.00   | 100  | 0.284463***  | 0.346932***  | 0.403054***  | 0.419524***  | 0.450096***  |
|        | 200  | 0.182323***  | 0.264428***  | 0.294969***  | 0.336303***  | 0.348912***  |
|        | 400  | 0.103878***  | 0.156422***  | 0.179949***  | 0.231749***  | 0.257277***  |
|        | 800  | 0.038412***  | 0.098306***  | 0.124905***  | 0.148143***  | 0.169266***  |
|        | 1600 | -0.000738    | 0.044403***  | 0.068119***  | 0.075144***  | 0.095688***  |
|        | 3200 | -0.013134*** | -0.001912    | 0.021663***  | 0.030841***  | 0.044368***  |
|        | 6400 | -0.009266*** | -0.028138*** | -0.015012*** | -0.004225*** | 0.001889     |

NOTE: One, two or three asterisks indicate significant differences from zero at 90, 95 or 99-percent levels.

**Table F.3:** IMSE for Frontier Estimates with Heteroskedastic Inefficiency and Noise

| $\rho$ | $n$  | SVKZ   |        |        |        |        | HMS    |        |        |        |        |
|--------|------|--------|--------|--------|--------|--------|--------|--------|--------|--------|--------|
|        |      | (1,1)  | (1,2)  | (2,2)  | (2,3)  | (3,3)  | (1,1)  | (1,2)  | (2,2)  | (2,3)  | (3,3)  |
| 0.00   | 100  | 0.0207 | 0.0356 | 0.0461 | 0.0546 | 0.0655 | 0.0179 | 0.0298 | 0.0349 | 0.0413 | 0.0444 |
|        | 200  | 0.0099 | 0.0229 | 0.0292 | 0.0332 | 0.0400 | 0.0089 | 0.0196 | 0.0244 | 0.0263 | 0.0302 |
|        | 400  | 0.0050 | 0.0135 | 0.0185 | 0.0207 | 0.0236 | 0.0045 | 0.0119 | 0.0162 | 0.0175 | 0.0192 |
|        | 800  | 0.0023 | 0.0071 | 0.0120 | 0.0134 | 0.0144 | 0.0022 | 0.0067 | 0.0111 | 0.0123 | 0.0128 |
|        | 1600 | 0.0012 | 0.0038 | 0.0079 | 0.0093 | 0.0097 | 0.0012 | 0.0037 | 0.0077 | 0.0090 | 0.0092 |
|        | 3200 | 0.0006 | 0.0021 | 0.0051 | 0.0071 | 0.0074 | 0.0006 | 0.0021 | 0.0051 | 0.0071 | 0.0073 |
|        | 6400 | 0.0003 | 0.0012 | 0.0033 | 0.0057 | 0.0063 | 0.0003 | 0.0012 | 0.0033 | 0.0057 | 0.0063 |
| 0.25   | 100  | 0.0230 | 0.0391 | 0.0488 | 0.0572 | 0.0693 | 0.0193 | 0.0312 | 0.0366 | 0.0429 | 0.0470 |
|        | 200  | 0.0111 | 0.0255 | 0.0316 | 0.0364 | 0.0434 | 0.0100 | 0.0211 | 0.0254 | 0.0279 | 0.0323 |
|        | 400  | 0.0055 | 0.0147 | 0.0199 | 0.0229 | 0.0257 | 0.0050 | 0.0130 | 0.0171 | 0.0189 | 0.0206 |
|        | 800  | 0.0025 | 0.0080 | 0.0131 | 0.0147 | 0.0154 | 0.0024 | 0.0074 | 0.0120 | 0.0132 | 0.0135 |
|        | 1600 | 0.0013 | 0.0042 | 0.0086 | 0.0100 | 0.0103 | 0.0013 | 0.0040 | 0.0083 | 0.0096 | 0.0097 |
|        | 3200 | 0.0006 | 0.0023 | 0.0055 | 0.0076 | 0.0079 | 0.0006 | 0.0023 | 0.0055 | 0.0075 | 0.0078 |
|        | 6400 | 0.0003 | 0.0013 | 0.0036 | 0.0061 | 0.0067 | 0.0003 | 0.0013 | 0.0036 | 0.0061 | 0.0067 |
| 0.50   | 100  | 0.0321 | 0.0503 | 0.0591 | 0.0670 | 0.0789 | 0.0238 | 0.0370 | 0.0444 | 0.0522 | 0.0582 |
|        | 200  | 0.0157 | 0.0334 | 0.0405 | 0.0458 | 0.0537 | 0.0129 | 0.0258 | 0.0301 | 0.0337 | 0.0398 |
|        | 400  | 0.0078 | 0.0204 | 0.0266 | 0.0302 | 0.0331 | 0.0067 | 0.0165 | 0.0209 | 0.0234 | 0.0256 |
|        | 800  | 0.0035 | 0.0108 | 0.0171 | 0.0195 | 0.0203 | 0.0033 | 0.0096 | 0.0147 | 0.0161 | 0.0168 |
|        | 1600 | 0.0017 | 0.0057 | 0.0112 | 0.0128 | 0.0132 | 0.0017 | 0.0054 | 0.0105 | 0.0117 | 0.0119 |
|        | 3200 | 0.0008 | 0.0030 | 0.0071 | 0.0094 | 0.0098 | 0.0008 | 0.0030 | 0.0070 | 0.0092 | 0.0095 |
|        | 6400 | 0.0004 | 0.0017 | 0.0046 | 0.0075 | 0.0081 | 0.0004 | 0.0017 | 0.0046 | 0.0075 | 0.0080 |
| 0.75   | 100  | 0.0486 | 0.0657 | 0.0749 | 0.0810 | 0.0930 | 0.0335 | 0.0530 | 0.0646 | 0.0773 | 0.0858 |
|        | 200  | 0.0268 | 0.0485 | 0.0557 | 0.0609 | 0.0681 | 0.0194 | 0.0355 | 0.0421 | 0.0481 | 0.0565 |
|        | 400  | 0.0135 | 0.0331 | 0.0391 | 0.0439 | 0.0475 | 0.0107 | 0.0233 | 0.0285 | 0.0335 | 0.0382 |
|        | 800  | 0.0060 | 0.0184 | 0.0269 | 0.0305 | 0.0304 | 0.0052 | 0.0146 | 0.0203 | 0.0218 | 0.0230 |
|        | 1600 | 0.0028 | 0.0095 | 0.0179 | 0.0200 | 0.0206 | 0.0027 | 0.0084 | 0.0151 | 0.0160 | 0.0162 |
|        | 3200 | 0.0013 | 0.0049 | 0.0113 | 0.0141 | 0.0147 | 0.0013 | 0.0046 | 0.0105 | 0.0129 | 0.0131 |
|        | 6400 | 0.0006 | 0.0026 | 0.0071 | 0.0109 | 0.0115 | 0.0006 | 0.0025 | 0.0070 | 0.0106 | 0.0110 |
| 1.00   | 100  | 0.0668 | 0.0818 | 0.0902 | 0.0967 | 0.1073 | 0.0580 | 0.0878 | 0.1043 | 0.1234 | 0.1355 |
|        | 200  | 0.0450 | 0.0671 | 0.0733 | 0.0772 | 0.0840 | 0.0341 | 0.0586 | 0.0707 | 0.0799 | 0.0932 |
|        | 400  | 0.0272 | 0.0518 | 0.0566 | 0.0610 | 0.0637 | 0.0182 | 0.0359 | 0.0444 | 0.0546 | 0.0613 |
|        | 800  | 0.0127 | 0.0347 | 0.0453 | 0.0474 | 0.0465 | 0.0097 | 0.0230 | 0.0297 | 0.0332 | 0.0360 |
|        | 1600 | 0.0057 | 0.0200 | 0.0342 | 0.0353 | 0.0346 | 0.0049 | 0.0147 | 0.0225 | 0.0230 | 0.0234 |
|        | 3200 | 0.0023 | 0.0095 | 0.0223 | 0.0263 | 0.0260 | 0.0022 | 0.0083 | 0.0172 | 0.0191 | 0.0188 |
|        | 6400 | 0.0011 | 0.0046 | 0.0132 | 0.0196 | 0.0196 | 0.0011 | 0.0044 | 0.0120 | 0.0167 | 0.0161 |
| 2.00   | 100  | 0.1269 | 0.1424 | 0.1563 | 0.1669 | 0.1822 | 0.4104 | 0.4964 | 0.5452 | 0.5997 | 0.6247 |
|        | 200  | 0.1066 | 0.1252 | 0.1302 | 0.1358 | 0.1467 | 0.2975 | 0.3933 | 0.4452 | 0.4688 | 0.5242 |
|        | 400  | 0.0930 | 0.1094 | 0.1120 | 0.1178 | 0.1223 | 0.1958 | 0.2762 | 0.3186 | 0.3509 | 0.3954 |
|        | 800  | 0.0824 | 0.1032 | 0.1057 | 0.1055 | 0.1055 | 0.1277 | 0.2026 | 0.2331 | 0.2620 | 0.2855 |
|        | 1600 | 0.0677 | 0.1019 | 0.1042 | 0.0968 | 0.0948 | 0.0724 | 0.1493 | 0.1713 | 0.1817 | 0.1895 |
|        | 3200 | 0.0457 | 0.0955 | 0.1072 | 0.0991 | 0.0934 | 0.0346 | 0.0951 | 0.1324 | 0.1322 | 0.1392 |
|        | 6400 | 0.0256 | 0.0791 | 0.1126 | 0.1073 | 0.0934 | 0.0161 | 0.0545 | 0.1013 | 0.1048 | 0.0976 |

**Table F.4:** Differences in IMSE, HMS versus SVKZ, Heteroskedastic Inefficiency and Noise

| $\rho$ | $n$  | (1,1)        | (1,2)        | (2,2)        | (2,3)        | (3,3)        |
|--------|------|--------------|--------------|--------------|--------------|--------------|
| 0.00   | 100  | -0.002813*** | -0.005766*** | -0.011150*** | -0.013373*** | -0.021110*** |
|        | 200  | -0.000963*** | -0.003373*** | -0.004775*** | -0.006889*** | -0.009817*** |
|        | 400  | -0.000427*** | -0.001582*** | -0.002285*** | -0.003193*** | -0.004339*** |
|        | 800  | -0.000056*** | -0.000377*** | -0.000871*** | -0.001132*** | -0.001603*** |
|        | 1600 | 0.000000     | -0.000104*** | -0.000254*** | -0.000306*** | -0.000496*** |
|        | 3200 | -0.000003    | -0.000010*** | -0.000040*** | -0.000039*** | -0.000131*** |
|        | 6400 | 0.000000     | 0.000000     | -0.000003*** | -0.000010**  | -0.000022*** |
| 0.25   | 100  | -0.003743*** | -0.007947*** | -0.012171*** | -0.014287*** | -0.022296*** |
|        | 200  | -0.001113*** | -0.004460*** | -0.006191*** | -0.008480*** | -0.011055*** |
|        | 400  | -0.000540*** | -0.001795*** | -0.002853*** | -0.004026*** | -0.005116*** |
|        | 800  | -0.000070*** | -0.000567*** | -0.001114*** | -0.001541*** | -0.001904*** |
|        | 1600 | -0.000001    | -0.000132*** | -0.000325*** | -0.000430*** | -0.000581*** |
|        | 3200 | -0.000003    | -0.000015*** | -0.000058*** | -0.000065*** | -0.000176*** |
|        | 6400 | 0.000000     | 0.000000     | -0.000005*** | -0.000008*** | -0.000037*** |
| 0.50   | 100  | -0.008305*** | -0.013306*** | -0.014689*** | -0.014725*** | -0.020692*** |
|        | 200  | -0.002850*** | -0.007571*** | -0.010445*** | -0.012047*** | -0.013845*** |
|        | 400  | -0.001091*** | -0.003873*** | -0.005626*** | -0.006824*** | -0.007486*** |
|        | 800  | -0.000232*** | -0.001198*** | -0.002376*** | -0.003439*** | -0.003492*** |
|        | 1600 | -0.000011*** | -0.000321*** | -0.000728*** | -0.001019*** | -0.001370*** |
|        | 3200 | -0.000006    | -0.000048*** | -0.000144*** | -0.000209*** | -0.000380*** |
|        | 6400 | 0.000000     | -0.000006*** | -0.000019*** | -0.000029*** | -0.000076*** |
| 0.75   | 100  | -0.015114*** | -0.012690*** | -0.010371*** | -0.003768**  | -0.007164*** |
|        | 200  | -0.007438*** | -0.012982*** | -0.013639*** | -0.012773*** | -0.011660*** |
|        | 400  | -0.002773*** | -0.009827*** | -0.010590*** | -0.010387*** | -0.009277*** |
|        | 800  | -0.000780*** | -0.003817*** | -0.006660*** | -0.008681*** | -0.007365*** |
|        | 1600 | -0.000160*** | -0.001097*** | -0.002841*** | -0.003981*** | -0.004421*** |
|        | 3200 | -0.000001    | -0.000215*** | -0.000736*** | -0.001188*** | -0.001617*** |
|        | 6400 | 0.000000     | -0.000033*** | -0.000127*** | -0.000265*** | -0.000532*** |
| 1.00   | 100  | -0.008824*** | 0.006066***  | 0.014108***  | 0.026786***  | 0.028212***  |
|        | 200  | -0.010938*** | -0.008559*** | -0.002612*   | 0.002615*    | 0.009202***  |
|        | 400  | -0.008980*** | -0.015850*** | -0.012159*** | -0.006390*** | -0.002354**  |
|        | 800  | -0.002965*** | -0.011678*** | -0.015565*** | -0.014273*** | -0.010475*** |
|        | 1600 | -0.000794*** | -0.005358*** | -0.011709*** | -0.012254*** | -0.011125*** |
|        | 3200 | -0.000085*** | -0.001182*** | -0.005098*** | -0.007147*** | -0.007214*** |
|        | 6400 | -0.000002    | -0.000199*** | -0.001147*** | -0.002904*** | -0.003488*** |
| 2.00   | 100  | 0.283525***  | 0.353977***  | 0.388882***  | 0.432786***  | 0.442439***  |
|        | 200  | 0.190896***  | 0.268136***  | 0.315044***  | 0.332992***  | 0.377434***  |
|        | 400  | 0.102743***  | 0.166809***  | 0.206615***  | 0.233049***  | 0.273093***  |
|        | 800  | 0.045325***  | 0.099329***  | 0.127388***  | 0.156520***  | 0.179984***  |
|        | 1600 | 0.004660**   | 0.047427***  | 0.067080***  | 0.084874***  | 0.094716***  |
|        | 3200 | -0.011095*** | -0.000350    | 0.025187***  | 0.033054***  | 0.045881***  |
|        | 6400 | -0.009582*** | -0.024610*** | -0.011318*** | -0.002496*   | 0.004231***  |

NOTE: One, two or three asterisks indicate significant differences from zero at 90, 95 or 99-percent levels.

**Table F.5:** Differences in IMSE for SVKZ Estimator Due to Heteroskedasticity

| $\rho$ | $n$  | (1,1)       | (1,2)       | (2,2)        | (2,3)        | (3,3)        |
|--------|------|-------------|-------------|--------------|--------------|--------------|
| 0.00   | 100  | 0.001336    | -0.001376   | -0.000007    | -0.000186    | 0.002361     |
|        | 200  | 0.000544    | 0.000202    | 0.000420     | -0.000503    | -0.000127    |
|        | 400  | 0.000625*** | 0.000947**  | 0.000850*    | 0.000214     | -0.000348    |
|        | 800  | 0.000164**  | 0.000394**  | 0.000516*    | 0.000251     | 0.000329     |
|        | 1600 | 0.000120*** | 0.000152*   | 0.000160     | -0.000049    | -0.000074    |
|        | 3200 | 0.000022    | 0.000073*   | -0.000034    | -0.000241*** | -0.000124    |
|        | 6400 | -0.000001   | 0.000007    | -0.000051    | -0.000196*** | -0.000253*** |
| 0.25   | 100  | 0.000940    | -0.001569   | -0.000981    | -0.000589    | 0.002469     |
|        | 200  | 0.000698    | 0.000436    | -0.000677    | -0.000225    | 0.000735     |
|        | 400  | 0.000541**  | 0.000518    | 0.000549     | 0.000503     | -0.000658    |
|        | 800  | 0.000181**  | 0.000662*** | 0.000435     | 0.000445     | 0.000535     |
|        | 1600 | 0.000140*** | 0.000224**  | 0.000150     | -0.000075    | -0.000115    |
|        | 3200 | 0.000029    | 0.000085*   | -0.000049    | -0.000205**  | -0.000119    |
|        | 6400 | 0.000012    | 0.000020    | -0.000058    | -0.000235*** | -0.000256*** |
| 0.50   | 100  | -0.000149   | -0.001250   | -0.001005    | -0.002062    | 0.001309     |
|        | 200  | 0.000746    | -0.000677   | -0.001382    | -0.000145    | 0.002146*    |
|        | 400  | 0.000691*   | -0.000006   | 0.000475     | 0.000898     | -0.000503    |
|        | 800  | 0.000391*** | 0.000749**  | 0.000014     | 0.001049*    | 0.000802     |
|        | 1600 | 0.000208*** | 0.000431*** | 0.000258     | -0.000202    | -0.000005    |
|        | 3200 | 0.000042    | 0.000137**  | -0.000073    | -0.000194    | -0.000077    |
|        | 6400 | 0.000029**  | 0.000039    | -0.000051    | -0.000281*** | -0.000249**  |
| 0.75   | 100  | -0.000476   | -0.001518   | -0.000583    | -0.002797    | 0.002693     |
|        | 200  | 0.001063    | -0.002162   | -0.001694    | 0.000261     | 0.001845     |
|        | 400  | 0.000691    | -0.000543   | -0.000468    | 0.000751     | 0.000893     |
|        | 800  | 0.000730*** | 0.000345    | -0.001124    | 0.001201     | 0.000340     |
|        | 1600 | 0.000437*** | 0.000734*** | -0.000169    | -0.000465    | -0.000124    |
|        | 3200 | 0.000040    | 0.000338*** | 0.000087     | -0.000422    | -0.000161    |
|        | 6400 | 0.000066*** | 0.000087*   | 0.000053     | -0.000366**  | -0.000133    |
| 1.00   | 100  | -0.000659   | -0.000998   | 0.000585     | -0.001918    | 0.001781     |
|        | 200  | -0.000604   | -0.001933   | -0.000804    | 0.000239     | 0.002112     |
|        | 400  | 0.000200    | -0.001044   | -0.000160    | 0.000787     | 0.000110     |
|        | 800  | 0.000946    | -0.001029   | -0.001476    | 0.000245     | 0.000229     |
|        | 1600 | 0.000985*** | 0.000849    | -0.000831    | -0.000470    | -0.000609    |
|        | 3200 | 0.000158*   | 0.000496*   | -0.000472    | -0.000679    | -0.001230*   |
|        | 6400 | 0.000152*** | 0.000246**  | 0.000262     | -0.000411    | -0.000597    |
| 2.00   | 100  | 0.000667    | 0.000816    | 0.002061     | -0.002140    | 0.003885     |
|        | 200  | -0.001299   | 0.003435    | -0.001499    | -0.000988    | 0.003278*    |
|        | 400  | -0.001039   | 0.000706    | 0.001246     | 0.001413     | 0.001534     |
|        | 800  | 0.001258    | 0.000093    | 0.001168     | -0.000585    | 0.000283     |
|        | 1600 | 0.000791    | -0.001125   | 0.000118     | -0.000823    | 0.000745     |
|        | 3200 | 0.002583    | -0.002313   | -0.001287    | 0.000127     | -0.001018    |
|        | 6400 | 0.002995**  | -0.002856   | -0.004210*** | -0.002024    | -0.003250**  |

NOTE: One, two or three asterisks indicate significant differences from zero at 90, 95 or 99-percent levels.

**Table F.6:** Differences in IMSE for HMS Estimator Due to Heteroskedasticity

| $\rho$ | $n$  | (1,1)       | (1,2)       | (2,2)       | (2,3)        | (3,3)        |
|--------|------|-------------|-------------|-------------|--------------|--------------|
| 0.00   | 100  | 0.001767*** | 0.002434*** | 0.000592    | 0.002493**   | 0.000683     |
|        | 200  | 0.000737**  | 0.000895    | 0.001588*** | 0.000019     | 0.000881     |
|        | 400  | 0.000302*   | 0.000539*   | 0.000911**  | 0.000541     | 0.000068     |
|        | 800  | 0.000108    | 0.000145    | 0.000086    | 0.000167     | 0.000275     |
|        | 1600 | 0.000122*** | 0.000049    | -0.000038   | -0.000179    | -0.000147    |
|        | 3200 | 0.000019    | 0.000064    | -0.000070   | -0.000263*** | -0.000196*   |
|        | 6400 | -0.000001   | 0.000007    | -0.000053   | -0.000206*** | -0.000262*** |
| 0.25   | 100  | 0.001868*** | 0.002093**  | -0.000032   | 0.002096**   | 0.000775     |
|        | 200  | 0.000945*** | 0.001149**  | 0.000916    | 0.000036     | 0.001765**   |
|        | 400  | 0.000271    | 0.000448    | 0.000672*   | 0.000921**   | 0.000033     |
|        | 800  | 0.000125    | 0.000252    | 0.000019    | 0.000279     | 0.000419     |
|        | 1600 | 0.000145*** | 0.000105    | -0.000082   | -0.000251    | -0.000203    |
|        | 3200 | 0.000026    | 0.000070    | -0.000105   | -0.000254**  | -0.000219    |
|        | 6400 | 0.000012    | 0.000019    | -0.000062   | -0.000242*** | -0.000275*** |
| 0.50   | 100  | 0.002213**  | 0.002414**  | 0.000595    | 0.001452     | 0.002393*    |
|        | 200  | 0.001087**  | 0.001750*** | 0.000765    | 0.000881     | 0.003250***  |
|        | 400  | 0.000341    | 0.000621    | 0.001137**  | 0.002002***  | 0.000660     |
|        | 800  | 0.000216*   | 0.000224    | 0.000005    | 0.000595*    | 0.000924**   |
|        | 1600 | 0.000206*** | 0.000189    | -0.000056   | -0.000389*   | -0.000052    |
|        | 3200 | 0.000035    | 0.000090    | -0.000197*  | -0.000314**  | -0.000216    |
|        | 6400 | 0.000029**  | 0.000033    | -0.000070   | -0.000292*** | -0.000283*** |
| 0.75   | 100  | 0.001946    | 0.002720*   | 0.001000    | 0.002667     | 0.005017**   |
|        | 200  | 0.001573**  | 0.002731*** | 0.001191    | 0.000985     | 0.002843*    |
|        | 400  | 0.001000**  | 0.001719*** | 0.002004*** | 0.003795***  | 0.004300***  |
|        | 800  | 0.000295    | 0.000824**  | 0.000465    | 0.000815     | 0.001301**   |
|        | 1600 | 0.000321*** | 0.000313    | -0.000198   | -0.000390    | 0.000016     |
|        | 3200 | 0.000040    | 0.000138    | -0.000283   | -0.000499**  | -0.000172    |
|        | 6400 | 0.000066*** | 0.000054    | -0.000067   | -0.000455*** | -0.000307*   |
| 1.00   | 100  | 0.000872    | 0.002244    | -0.001397   | 0.002268     | 0.003515     |
|        | 200  | 0.003787*** | 0.003806*   | 0.002072    | -0.000315    | 0.004987**   |
|        | 400  | 0.001554**  | 0.002197**  | 0.003630*** | 0.005784***  | 0.004899**   |
|        | 800  | 0.000897**  | 0.001573*** | 0.001154    | 0.001183     | 0.001849*    |
|        | 1600 | 0.000647*** | 0.000615*   | 0.000381    | -0.000189    | -0.000356    |
|        | 3200 | 0.000077    | 0.000153    | -0.000598*  | -0.000482    | -0.000408    |
|        | 6400 | 0.000150*** | 0.000074    | -0.000251   | -0.000768*** | -0.000695*** |
| 2.00   | 100  | -0.000271   | 0.007861    | -0.012111   | 0.011122     | -0.003772    |
|        | 200  | 0.007273    | 0.007144    | 0.018575    | -0.004299    | 0.031801**   |
|        | 400  | -0.002174   | 0.011093    | 0.027912*** | 0.002714     | 0.017351*    |
|        | 800  | 0.008172    | 0.001116    | 0.003650    | 0.007793     | 0.011001     |
|        | 1600 | 0.006188*   | 0.001899    | -0.000921   | 0.008907*    | -0.000226    |
|        | 3200 | 0.004622*** | -0.000751   | 0.002237    | 0.002340     | 0.000494     |
|        | 6400 | 0.002680*** | 0.000672    | -0.000516   | -0.000295    | -0.000907    |

NOTE: One, two or three asterisks indicate significant differences from zero at 90, 95 or 99-percent levels.



**Table F.7:** Median Average Square Error for Derivatives of Expected Efficiency  $\mu_\eta(Z)$ , with Heteroskedasticity

| $\rho$ | $n$  | SVKZ   |        |        |        |        | HMS    |        |        |        |        |
|--------|------|--------|--------|--------|--------|--------|--------|--------|--------|--------|--------|
|        |      | (1,1)  | (1,2)  | (2,2)  | (2,3)  | (3,3)  | (1,1)  | (1,2)  | (2,2)  | (2,3)  | (3,3)  |
| 0.00   | 100  | 0.0182 | 0.0330 | 0.0458 | 0.0571 | 0.0663 | 0.0183 | 0.0350 | 0.0509 | 0.0642 | 0.0784 |
|        | 200  | 0.0170 | 0.0284 | 0.0322 | 0.0364 | 0.0403 | 0.0170 | 0.0288 | 0.0325 | 0.0365 | 0.0418 |
|        | 400  | 0.0163 | 0.0219 | 0.0223 | 0.0229 | 0.0256 | 0.0163 | 0.0219 | 0.0224 | 0.0230 | 0.0259 |
|        | 800  | 0.0176 | 0.0185 | 0.0184 | 0.0168 | 0.0167 | 0.0176 | 0.0185 | 0.0184 | 0.0168 | 0.0167 |
|        | 1600 | 0.0177 | 0.0176 | 0.0155 | 0.0124 | 0.0121 | 0.0177 | 0.0176 | 0.0155 | 0.0124 | 0.0121 |
|        | 3200 | 0.0179 | 0.0164 | 0.0134 | 0.0100 | 0.0088 | 0.0179 | 0.0164 | 0.0134 | 0.0100 | 0.0088 |
|        | 6400 | 0.0175 | 0.0164 | 0.0129 | 0.0087 | 0.0077 | 0.0175 | 0.0164 | 0.0129 | 0.0087 | 0.0077 |
| 0.25   | 100  | 0.0187 | 0.0393 | 0.0502 | 0.0624 | 0.0710 | 0.0197 | 0.0413 | 0.0565 | 0.0726 | 0.0954 |
|        | 200  | 0.0179 | 0.0304 | 0.0355 | 0.0394 | 0.0468 | 0.0180 | 0.0307 | 0.0363 | 0.0405 | 0.0492 |
|        | 400  | 0.0168 | 0.0229 | 0.0246 | 0.0256 | 0.0292 | 0.0168 | 0.0229 | 0.0246 | 0.0259 | 0.0295 |
|        | 800  | 0.0176 | 0.0198 | 0.0191 | 0.0182 | 0.0181 | 0.0176 | 0.0198 | 0.0191 | 0.0183 | 0.0181 |
|        | 1600 | 0.0172 | 0.0173 | 0.0158 | 0.0132 | 0.0130 | 0.0172 | 0.0173 | 0.0158 | 0.0132 | 0.0131 |
|        | 3200 | 0.0177 | 0.0164 | 0.0137 | 0.0105 | 0.0092 | 0.0177 | 0.0164 | 0.0137 | 0.0105 | 0.0092 |
|        | 6400 | 0.0177 | 0.0164 | 0.0130 | 0.0089 | 0.0081 | 0.0177 | 0.0164 | 0.0130 | 0.0089 | 0.0081 |
| 0.50   | 100  | 0.0219 | 0.0512 | 0.0659 | 0.0850 | 0.0843 | 0.0265 | 0.0635 | 0.0851 | 0.1130 | 0.1474 |
|        | 200  | 0.0196 | 0.0400 | 0.0463 | 0.0545 | 0.0662 | 0.0200 | 0.0414 | 0.0494 | 0.0600 | 0.0764 |
|        | 400  | 0.0178 | 0.0270 | 0.0332 | 0.0348 | 0.0399 | 0.0178 | 0.0273 | 0.0337 | 0.0360 | 0.0403 |
|        | 800  | 0.0177 | 0.0218 | 0.0228 | 0.0242 | 0.0241 | 0.0177 | 0.0218 | 0.0228 | 0.0242 | 0.0243 |
|        | 1600 | 0.0173 | 0.0181 | 0.0177 | 0.0159 | 0.0160 | 0.0173 | 0.0181 | 0.0177 | 0.0159 | 0.0160 |
|        | 3200 | 0.0179 | 0.0170 | 0.0145 | 0.0124 | 0.0114 | 0.0179 | 0.0170 | 0.0145 | 0.0124 | 0.0114 |
|        | 6400 | 0.0176 | 0.0163 | 0.0135 | 0.0098 | 0.0095 | 0.0176 | 0.0163 | 0.0135 | 0.0098 | 0.0095 |
| 0.75   | 100  | 0.0269 | 0.0573 | 0.0828 | 0.1034 | 0.1089 | 0.0462 | 0.1046 | 0.1483 | 0.2019 | 0.2829 |
|        | 200  | 0.0264 | 0.0589 | 0.0644 | 0.0826 | 0.0928 | 0.0284 | 0.0731 | 0.0901 | 0.1056 | 0.1351 |
|        | 400  | 0.0190 | 0.0362 | 0.0510 | 0.0558 | 0.0631 | 0.0193 | 0.0391 | 0.0558 | 0.0633 | 0.0726 |
|        | 800  | 0.0180 | 0.0272 | 0.0324 | 0.0391 | 0.0403 | 0.0180 | 0.0273 | 0.0333 | 0.0403 | 0.0409 |
|        | 1600 | 0.0170 | 0.0205 | 0.0231 | 0.0239 | 0.0245 | 0.0170 | 0.0205 | 0.0233 | 0.0242 | 0.0251 |
|        | 3200 | 0.0179 | 0.0177 | 0.0173 | 0.0164 | 0.0170 | 0.0179 | 0.0177 | 0.0173 | 0.0164 | 0.0171 |
|        | 6400 | 0.0177 | 0.0166 | 0.0147 | 0.0125 | 0.0130 | 0.0177 | 0.0166 | 0.0147 | 0.0125 | 0.0130 |
| 1.00   | 100  | 0.0259 | 0.0672 | 0.0901 | 0.1155 | 0.1190 | 0.0767 | 0.1846 | 0.2748 | 0.3875 | 0.4502 |
|        | 200  | 0.0315 | 0.0741 | 0.0849 | 0.1093 | 0.1107 | 0.0528 | 0.1301 | 0.1812 | 0.2352 | 0.2923 |
|        | 400  | 0.0264 | 0.0494 | 0.0738 | 0.0921 | 0.0962 | 0.0308 | 0.0744 | 0.1035 | 0.1265 | 0.1455 |
|        | 800  | 0.0194 | 0.0417 | 0.0552 | 0.0622 | 0.0678 | 0.0197 | 0.0454 | 0.0677 | 0.0801 | 0.0821 |
|        | 1600 | 0.0168 | 0.0287 | 0.0397 | 0.0447 | 0.0450 | 0.0168 | 0.0288 | 0.0416 | 0.0472 | 0.0491 |
|        | 3200 | 0.0182 | 0.0213 | 0.0254 | 0.0294 | 0.0320 | 0.0182 | 0.0213 | 0.0257 | 0.0301 | 0.0327 |
|        | 6400 | 0.0178 | 0.0178 | 0.0181 | 0.0196 | 0.0218 | 0.0178 | 0.0178 | 0.0181 | 0.0197 | 0.0223 |
| 2.00   | 100  | 0.0036 | 0.0032 | 0.0024 | 0.0013 | 0.0008 | 0.2859 | 0.7817 | 1.0884 | 1.4798 | 1.8207 |
|        | 200  | 0.0036 | 0.0032 | 0.0024 | 0.0068 | 0.0008 | 0.2666 | 0.7382 | 1.0145 | 1.4084 | 1.8834 |
|        | 400  | 0.0121 | 0.0211 | 0.0430 | 0.0920 | 0.0213 | 0.2010 | 0.5514 | 0.8411 | 1.1637 | 1.4428 |
|        | 800  | 0.0106 | 0.0032 | 0.0024 | 0.0013 | 0.0740 | 0.1610 | 0.4011 | 0.7363 | 1.0270 | 1.4034 |
|        | 1600 | 0.0185 | 0.0032 | 0.0024 | 0.0013 | 0.0802 | 0.1077 | 0.4311 | 0.5550 | 0.8538 | 0.8346 |
|        | 3200 | 0.0267 | 0.0032 | 0.0024 | 0.0013 | 0.0008 | 0.0550 | 0.2867 | 0.4715 | 0.7489 | 0.8256 |
|        | 6400 | 0.0248 | 0.0444 | 0.0024 | 0.0013 | 0.0008 | 0.0298 | 0.1729 | 0.3987 | 0.5710 | 0.6829 |

**Table F.8:** Median Average Square Error for Estimated Marginal Product, with Heteroskedasticity

| $\rho$ | $n$  | SVKZ   |        |        |        |        | HMS    |        |        |        |        |
|--------|------|--------|--------|--------|--------|--------|--------|--------|--------|--------|--------|
|        |      | (1,1)  | (1,2)  | (2,2)  | (2,3)  | (3,3)  | (1,1)  | (1,2)  | (2,2)  | (2,3)  | (3,3)  |
| 0.00   | 100  | 0.0833 | 0.0737 | 0.1278 | 0.1469 | 0.1875 | 0.0836 | 0.0795 | 0.1475 | 0.1673 | 0.2359 |
|        | 200  | 0.0472 | 0.0406 | 0.0761 | 0.0885 | 0.1434 | 0.0472 | 0.0422 | 0.0768 | 0.0886 | 0.1515 |
|        | 400  | 0.0277 | 0.0242 | 0.0475 | 0.0527 | 0.0798 | 0.0277 | 0.0242 | 0.0478 | 0.0528 | 0.0814 |
|        | 800  | 0.0192 | 0.0150 | 0.0350 | 0.0359 | 0.0528 | 0.0192 | 0.0150 | 0.0350 | 0.0359 | 0.0533 |
|        | 1600 | 0.0138 | 0.0102 | 0.0189 | 0.0233 | 0.0325 | 0.0138 | 0.0102 | 0.0189 | 0.0233 | 0.0325 |
|        | 3200 | 0.0099 | 0.0079 | 0.0115 | 0.0124 | 0.0213 | 0.0099 | 0.0079 | 0.0115 | 0.0124 | 0.0214 |
|        | 6400 | 0.0071 | 0.0064 | 0.0083 | 0.0079 | 0.0148 | 0.0071 | 0.0064 | 0.0083 | 0.0079 | 0.0148 |
| 0.25   | 100  | 0.0882 | 0.0748 | 0.1470 | 0.1460 | 0.2188 | 0.0889 | 0.0835 | 0.1703 | 0.1683 | 0.2874 |
|        | 200  | 0.0542 | 0.0500 | 0.0834 | 0.0997 | 0.1533 | 0.0547 | 0.0505 | 0.0859 | 0.1022 | 0.1633 |
|        | 400  | 0.0310 | 0.0239 | 0.0586 | 0.0595 | 0.0859 | 0.0310 | 0.0239 | 0.0586 | 0.0605 | 0.0880 |
|        | 800  | 0.0193 | 0.0156 | 0.0356 | 0.0365 | 0.0552 | 0.0193 | 0.0156 | 0.0356 | 0.0366 | 0.0572 |
|        | 1600 | 0.0137 | 0.0103 | 0.0205 | 0.0219 | 0.0401 | 0.0137 | 0.0103 | 0.0205 | 0.0219 | 0.0405 |
|        | 3200 | 0.0115 | 0.0086 | 0.0124 | 0.0135 | 0.0232 | 0.0115 | 0.0086 | 0.0124 | 0.0135 | 0.0232 |
|        | 6400 | 0.0076 | 0.0070 | 0.0084 | 0.0078 | 0.0162 | 0.0076 | 0.0070 | 0.0084 | 0.0078 | 0.0162 |
| 0.50   | 100  | 0.1069 | 0.0972 | 0.2058 | 0.1847 | 0.2576 | 0.1219 | 0.1319 | 0.2573 | 0.2745 | 0.3936 |
|        | 200  | 0.0729 | 0.0720 | 0.1199 | 0.1337 | 0.1979 | 0.0733 | 0.0749 | 0.1282 | 0.1546 | 0.2414 |
|        | 400  | 0.0353 | 0.0359 | 0.0867 | 0.0851 | 0.1273 | 0.0353 | 0.0364 | 0.0880 | 0.0896 | 0.1311 |
|        | 800  | 0.0206 | 0.0210 | 0.0468 | 0.0481 | 0.0748 | 0.0206 | 0.0210 | 0.0468 | 0.0485 | 0.0757 |
|        | 1600 | 0.0153 | 0.0118 | 0.0255 | 0.0306 | 0.0534 | 0.0153 | 0.0118 | 0.0255 | 0.0308 | 0.0542 |
|        | 3200 | 0.0132 | 0.0103 | 0.0138 | 0.0185 | 0.0298 | 0.0132 | 0.0103 | 0.0138 | 0.0185 | 0.0298 |
|        | 6400 | 0.0079 | 0.0079 | 0.0094 | 0.0102 | 0.0207 | 0.0079 | 0.0079 | 0.0094 | 0.0102 | 0.0209 |
| 0.75   | 100  | 0.1519 | 0.1129 | 0.2258 | 0.2155 | 0.3269 | 0.2234 | 0.2226 | 0.4871 | 0.4396 | 0.6332 |
|        | 200  | 0.1050 | 0.1365 | 0.1782 | 0.1851 | 0.2508 | 0.1150 | 0.1714 | 0.2775 | 0.2812 | 0.4314 |
|        | 400  | 0.0516 | 0.0609 | 0.1377 | 0.1296 | 0.1922 | 0.0516 | 0.0679 | 0.1615 | 0.1678 | 0.2543 |
|        | 800  | 0.0304 | 0.0335 | 0.0799 | 0.0891 | 0.1315 | 0.0306 | 0.0340 | 0.0819 | 0.0963 | 0.1360 |
|        | 1600 | 0.0186 | 0.0178 | 0.0433 | 0.0457 | 0.0798 | 0.0186 | 0.0178 | 0.0436 | 0.0467 | 0.0835 |
|        | 3200 | 0.0164 | 0.0118 | 0.0208 | 0.0293 | 0.0449 | 0.0164 | 0.0118 | 0.0208 | 0.0294 | 0.0457 |
|        | 6400 | 0.0087 | 0.0093 | 0.0119 | 0.0156 | 0.0332 | 0.0087 | 0.0093 | 0.0119 | 0.0156 | 0.0332 |
| 1.00   | 100  | 0.1504 | 0.1649 | 0.2677 | 0.2354 | 0.3579 | 0.4225 | 0.3933 | 0.8651 | 0.6515 | 0.8998 |
|        | 200  | 0.1708 | 0.1431 | 0.2045 | 0.2275 | 0.2889 | 0.2664 | 0.3430 | 0.6075 | 0.5562 | 0.7256 |
|        | 400  | 0.0858 | 0.0890 | 0.1941 | 0.1897 | 0.2587 | 0.1026 | 0.1624 | 0.3796 | 0.3205 | 0.5062 |
|        | 800  | 0.0529 | 0.0726 | 0.1469 | 0.1372 | 0.2200 | 0.0538 | 0.0836 | 0.2025 | 0.2322 | 0.2779 |
|        | 1600 | 0.0252 | 0.0314 | 0.0905 | 0.0919 | 0.1386 | 0.0252 | 0.0314 | 0.1001 | 0.1096 | 0.1724 |
|        | 3200 | 0.0194 | 0.0156 | 0.0421 | 0.0630 | 0.0840 | 0.0194 | 0.0156 | 0.0425 | 0.0672 | 0.0884 |
|        | 6400 | 0.0110 | 0.0118 | 0.0195 | 0.0313 | 0.0646 | 0.0110 | 0.0118 | 0.0195 | 0.0314 | 0.0671 |
| 2.00   | 100  | 0.1810 | 0.1606 | 0.4240 | 0.3151 | 0.4970 | 1.5143 | 0.9216 | 1.6562 | 0.8609 | 0.9649 |
|        | 200  | 0.1882 | 0.1200 | 0.2492 | 0.2869 | 0.3211 | 1.6679 | 1.0047 | 1.2736 | 0.8969 | 1.0565 |
|        | 400  | 0.1535 | 0.1006 | 0.1963 | 0.1680 | 0.2475 | 1.1596 | 0.9809 | 1.5572 | 0.8425 | 1.1034 |
|        | 800  | 0.1119 | 0.0553 | 0.1020 | 0.0986 | 0.1546 | 0.9428 | 0.7703 | 1.3756 | 0.8066 | 1.0385 |
|        | 1600 | 0.1050 | 0.0365 | 0.0530 | 0.0516 | 0.1216 | 0.5052 | 0.6653 | 1.3412 | 0.7155 | 1.0097 |
|        | 3200 | 0.0937 | 0.0465 | 0.0283 | 0.0217 | 0.0477 | 0.1938 | 0.4422 | 1.0167 | 0.8166 | 1.0893 |
|        | 6400 | 0.0566 | 0.0536 | 0.0203 | 0.0104 | 0.0200 | 0.0698 | 0.3163 | 0.8885 | 0.6330 | 0.9004 |

**Table F.9:** IMSE for Frontier Estimates with No Heteroskedasticity (Exponential Inefficiency)

| $\rho$ | $n$  | SVKZ   |        |        |        |        | HMS    |        |        |        |        |
|--------|------|--------|--------|--------|--------|--------|--------|--------|--------|--------|--------|
|        |      | (1,1)  | (1,2)  | (2,2)  | (2,3)  | (3,3)  | (1,1)  | (1,2)  | (2,2)  | (2,3)  | (3,3)  |
| 0.00   | 100  | 0.0569 | 0.0611 | 0.0727 | 0.0750 | 0.0839 | 0.0718 | 0.0925 | 0.1241 | 0.1328 | 0.1473 |
|        | 200  | 0.0575 | 0.0575 | 0.0623 | 0.0664 | 0.0695 | 0.0645 | 0.0723 | 0.0892 | 0.1043 | 0.1113 |
|        | 400  | 0.0557 | 0.0517 | 0.0575 | 0.0610 | 0.0663 | 0.0563 | 0.0560 | 0.0693 | 0.0785 | 0.0908 |
|        | 800  | 0.0600 | 0.0505 | 0.0517 | 0.0585 | 0.0621 | 0.0602 | 0.0519 | 0.0548 | 0.0672 | 0.0727 |
|        | 1600 | 0.0640 | 0.0518 | 0.0493 | 0.0523 | 0.0560 | 0.0642 | 0.0519 | 0.0501 | 0.0543 | 0.0588 |
|        | 3200 | 0.0652 | 0.0560 | 0.0486 | 0.0498 | 0.0522 | 0.0652 | 0.0560 | 0.0487 | 0.0501 | 0.0527 |
|        | 6400 | 0.0671 | 0.0589 | 0.0509 | 0.0482 | 0.0503 | 0.0671 | 0.0589 | 0.0509 | 0.0482 | 0.0504 |
| 0.25   | 100  | 0.0581 | 0.0626 | 0.0748 | 0.0776 | 0.0874 | 0.0736 | 0.0959 | 0.1287 | 0.1388 | 0.1518 |
|        | 200  | 0.0574 | 0.0587 | 0.0642 | 0.0686 | 0.0719 | 0.0648 | 0.0749 | 0.0930 | 0.1086 | 0.1173 |
|        | 400  | 0.0556 | 0.0525 | 0.0586 | 0.0615 | 0.0678 | 0.0564 | 0.0574 | 0.0706 | 0.0794 | 0.0946 |
|        | 800  | 0.0595 | 0.0505 | 0.0523 | 0.0591 | 0.0631 | 0.0597 | 0.0518 | 0.0557 | 0.0684 | 0.0738 |
|        | 1600 | 0.0637 | 0.0517 | 0.0493 | 0.0527 | 0.0562 | 0.0639 | 0.0519 | 0.0502 | 0.0546 | 0.0593 |
|        | 3200 | 0.0650 | 0.0555 | 0.0482 | 0.0498 | 0.0523 | 0.0650 | 0.0556 | 0.0483 | 0.0501 | 0.0527 |
|        | 6400 | 0.0671 | 0.0585 | 0.0503 | 0.0479 | 0.0502 | 0.0671 | 0.0585 | 0.0503 | 0.0480 | 0.0503 |
| 0.50   | 100  | 0.0626 | 0.0692 | 0.0826 | 0.0872 | 0.0981 | 0.0804 | 0.1086 | 0.1466 | 0.1565 | 0.1721 |
|        | 200  | 0.0588 | 0.0629 | 0.0702 | 0.0749 | 0.0781 | 0.0676 | 0.0820 | 0.1043 | 0.1224 | 0.1336 |
|        | 400  | 0.0555 | 0.0548 | 0.0617 | 0.0650 | 0.0724 | 0.0566 | 0.0608 | 0.0759 | 0.0862 | 0.1049 |
|        | 800  | 0.0584 | 0.0506 | 0.0539 | 0.0610 | 0.0655 | 0.0587 | 0.0520 | 0.0583 | 0.0718 | 0.0781 |
|        | 1600 | 0.0628 | 0.0508 | 0.0495 | 0.0538 | 0.0573 | 0.0630 | 0.0511 | 0.0506 | 0.0563 | 0.0608 |
|        | 3200 | 0.0643 | 0.0541 | 0.0473 | 0.0500 | 0.0526 | 0.0643 | 0.0541 | 0.0474 | 0.0504 | 0.0533 |
|        | 6400 | 0.0666 | 0.0572 | 0.0488 | 0.0471 | 0.0498 | 0.0666 | 0.0572 | 0.0489 | 0.0472 | 0.0499 |
| 0.75   | 100  | 0.0730 | 0.0841 | 0.0991 | 0.1042 | 0.1160 | 0.0963 | 0.1392 | 0.1859 | 0.1984 | 0.2202 |
|        | 200  | 0.0627 | 0.0716 | 0.0802 | 0.0863 | 0.0909 | 0.0741 | 0.0981 | 0.1245 | 0.1509 | 0.1666 |
|        | 400  | 0.0562 | 0.0591 | 0.0674 | 0.0721 | 0.0802 | 0.0578 | 0.0682 | 0.0860 | 0.1012 | 0.1232 |
|        | 800  | 0.0572 | 0.0518 | 0.0568 | 0.0652 | 0.0703 | 0.0575 | 0.0539 | 0.0633 | 0.0802 | 0.0883 |
|        | 1600 | 0.0613 | 0.0495 | 0.0499 | 0.0556 | 0.0596 | 0.0615 | 0.0500 | 0.0516 | 0.0589 | 0.0649 |
|        | 3200 | 0.0631 | 0.0517 | 0.0460 | 0.0501 | 0.0533 | 0.0631 | 0.0517 | 0.0461 | 0.0509 | 0.0546 |
|        | 6400 | 0.0658 | 0.0550 | 0.0464 | 0.0459 | 0.0491 | 0.0658 | 0.0550 | 0.0464 | 0.0460 | 0.0492 |
| 1.00   | 100  | 0.0900 | 0.1035 | 0.1216 | 0.1264 | 0.1413 | 0.1343 | 0.2001 | 0.2636 | 0.2753 | 0.3095 |
|        | 200  | 0.0730 | 0.0852 | 0.0961 | 0.1045 | 0.1090 | 0.0912 | 0.1301 | 0.1686 | 0.2073 | 0.2286 |
|        | 400  | 0.0590 | 0.0676 | 0.0777 | 0.0847 | 0.0942 | 0.0624 | 0.0838 | 0.1083 | 0.1330 | 0.1632 |
|        | 800  | 0.0563 | 0.0551 | 0.0621 | 0.0719 | 0.0782 | 0.0568 | 0.0590 | 0.0730 | 0.0954 | 0.1081 |
|        | 1600 | 0.0593 | 0.0485 | 0.0517 | 0.0587 | 0.0638 | 0.0595 | 0.0496 | 0.0548 | 0.0646 | 0.0729 |
|        | 3200 | 0.0615 | 0.0486 | 0.0446 | 0.0505 | 0.0548 | 0.0615 | 0.0486 | 0.0448 | 0.0522 | 0.0573 |
|        | 6400 | 0.0645 | 0.0517 | 0.0433 | 0.0443 | 0.0484 | 0.0645 | 0.0517 | 0.0433 | 0.0449 | 0.0488 |
| 2.00   | 100  | 0.2014 | 0.2256 | 0.2579 | 0.2768 | 0.2989 | 0.7316 | 0.9399 | 1.0986 | 1.1562 | 1.2255 |
|        | 200  | 0.1632 | 0.1860 | 0.2051 | 0.2239 | 0.2321 | 0.4790 | 0.6829 | 0.7962 | 0.8903 | 0.9529 |
|        | 400  | 0.1266 | 0.1497 | 0.1696 | 0.1822 | 0.1965 | 0.3126 | 0.4452 | 0.5245 | 0.6322 | 0.7184 |
|        | 800  | 0.0958 | 0.1206 | 0.1330 | 0.1463 | 0.1569 | 0.1701 | 0.2788 | 0.3438 | 0.4053 | 0.4737 |
|        | 1600 | 0.0687 | 0.0887 | 0.1042 | 0.1165 | 0.1254 | 0.0880 | 0.1597 | 0.2115 | 0.2579 | 0.3004 |
|        | 3200 | 0.0580 | 0.0615 | 0.0753 | 0.0870 | 0.0950 | 0.0615 | 0.0827 | 0.1169 | 0.1458 | 0.1756 |
|        | 6400 | 0.0560 | 0.0426 | 0.0526 | 0.0625 | 0.0715 | 0.0561 | 0.0446 | 0.0630 | 0.0805 | 0.0996 |

**Table F.10:** IMSE for Frontier Estimates with Heteroskedastic, Exponential Inefficiency and Noise

| $\rho$ | $n$  | SVKZ   |        |        |        |        | HMS    |        |        |        |        |
|--------|------|--------|--------|--------|--------|--------|--------|--------|--------|--------|--------|
|        |      | (1,1)  | (1,2)  | (2,2)  | (2,3)  | (3,3)  | (1,1)  | (1,2)  | (2,2)  | (2,3)  | (3,3)  |
| 0.00   | 100  | 0.0582 | 0.0661 | 0.0687 | 0.0765 | 0.0793 | 0.0776 | 0.1112 | 0.1243 | 0.1392 | 0.1514 |
|        | 200  | 0.0569 | 0.0623 | 0.0660 | 0.0701 | 0.0731 | 0.0685 | 0.0907 | 0.1020 | 0.1124 | 0.1244 |
|        | 400  | 0.0578 | 0.0537 | 0.0574 | 0.0633 | 0.0658 | 0.0610 | 0.0639 | 0.0733 | 0.0855 | 0.0920 |
|        | 800  | 0.0598 | 0.0525 | 0.0541 | 0.0583 | 0.0634 | 0.0610 | 0.0552 | 0.0606 | 0.0670 | 0.0778 |
|        | 1600 | 0.0635 | 0.0548 | 0.0500 | 0.0537 | 0.0575 | 0.0636 | 0.0556 | 0.0516 | 0.0561 | 0.0619 |
|        | 3200 | 0.0654 | 0.0570 | 0.0502 | 0.0507 | 0.0546 | 0.0655 | 0.0572 | 0.0505 | 0.0513 | 0.0563 |
|        | 6400 | 0.0673 | 0.0603 | 0.0517 | 0.0494 | 0.0519 | 0.0673 | 0.0603 | 0.0519 | 0.0495 | 0.0522 |
| 0.25   | 100  | 0.0594 | 0.0680 | 0.0704 | 0.0798 | 0.0840 | 0.0805 | 0.1138 | 0.1279 | 0.1475 | 0.1607 |
|        | 200  | 0.0572 | 0.0629 | 0.0673 | 0.0715 | 0.0746 | 0.0692 | 0.0915 | 0.1040 | 0.1158 | 0.1298 |
|        | 400  | 0.0579 | 0.0545 | 0.0589 | 0.0642 | 0.0676 | 0.0612 | 0.0657 | 0.0752 | 0.0882 | 0.0960 |
|        | 800  | 0.0598 | 0.0527 | 0.0549 | 0.0588 | 0.0642 | 0.0608 | 0.0557 | 0.0620 | 0.0681 | 0.0790 |
|        | 1600 | 0.0633 | 0.0544 | 0.0500 | 0.0543 | 0.0578 | 0.0633 | 0.0552 | 0.0517 | 0.0569 | 0.0624 |
|        | 3200 | 0.0652 | 0.0565 | 0.0500 | 0.0508 | 0.0549 | 0.0653 | 0.0568 | 0.0503 | 0.0515 | 0.0567 |
|        | 6400 | 0.0671 | 0.0599 | 0.0512 | 0.0492 | 0.0518 | 0.0671 | 0.0599 | 0.0514 | 0.0493 | 0.0520 |
| 0.50   | 100  | 0.0640 | 0.0749 | 0.0781 | 0.0907 | 0.0946 | 0.0894 | 0.1253 | 0.1439 | 0.1689 | 0.1837 |
|        | 200  | 0.0586 | 0.0667 | 0.0725 | 0.0775 | 0.0811 | 0.0715 | 0.0992 | 0.1133 | 0.1283 | 0.1453 |
|        | 400  | 0.0579 | 0.0568 | 0.0623 | 0.0681 | 0.0719 | 0.0618 | 0.0702 | 0.0817 | 0.0972 | 0.1057 |
|        | 800  | 0.0593 | 0.0530 | 0.0564 | 0.0608 | 0.0672 | 0.0602 | 0.0567 | 0.0647 | 0.0719 | 0.0852 |
|        | 1600 | 0.0625 | 0.0535 | 0.0503 | 0.0555 | 0.0592 | 0.0626 | 0.0545 | 0.0523 | 0.0589 | 0.0645 |
|        | 3200 | 0.0644 | 0.0551 | 0.0494 | 0.0509 | 0.0554 | 0.0646 | 0.0554 | 0.0500 | 0.0517 | 0.0576 |
|        | 6400 | 0.0663 | 0.0585 | 0.0497 | 0.0484 | 0.0518 | 0.0663 | 0.0585 | 0.0499 | 0.0486 | 0.0521 |
| 0.75   | 100  | 0.0740 | 0.0881 | 0.0943 | 0.1081 | 0.1137 | 0.1074 | 0.1523 | 0.1808 | 0.2176 | 0.2360 |
|        | 200  | 0.0628 | 0.0750 | 0.0826 | 0.0891 | 0.0932 | 0.0786 | 0.1145 | 0.1350 | 0.1555 | 0.1780 |
|        | 400  | 0.0584 | 0.0616 | 0.0683 | 0.0753 | 0.0801 | 0.0636 | 0.0786 | 0.0945 | 0.1141 | 0.1258 |
|        | 800  | 0.0587 | 0.0539 | 0.0595 | 0.0649 | 0.0719 | 0.0597 | 0.0591 | 0.0705 | 0.0805 | 0.0969 |
|        | 1600 | 0.0613 | 0.0521 | 0.0509 | 0.0576 | 0.0614 | 0.0614 | 0.0535 | 0.0535 | 0.0626 | 0.0691 |
|        | 3200 | 0.0633 | 0.0530 | 0.0484 | 0.0509 | 0.0562 | 0.0634 | 0.0534 | 0.0494 | 0.0522 | 0.0591 |
|        | 6400 | 0.0652 | 0.0563 | 0.0472 | 0.0471 | 0.0511 | 0.0652 | 0.0563 | 0.0473 | 0.0473 | 0.0516 |
| 1.00   | 100  | 0.0912 | 0.1087 | 0.1179 | 0.1319 | 0.1404 | 0.1472 | 0.2114 | 0.2549 | 0.3030 | 0.3290 |
|        | 200  | 0.0723 | 0.0894 | 0.0986 | 0.1074 | 0.1115 | 0.0953 | 0.1474 | 0.1809 | 0.2066 | 0.2445 |
|        | 400  | 0.0614 | 0.0699 | 0.0791 | 0.0872 | 0.0946 | 0.0693 | 0.0955 | 0.1189 | 0.1456 | 0.1679 |
|        | 800  | 0.0583 | 0.0567 | 0.0656 | 0.0714 | 0.0797 | 0.0599 | 0.0652 | 0.0823 | 0.0952 | 0.1173 |
|        | 1600 | 0.0596 | 0.0514 | 0.0529 | 0.0613 | 0.0656 | 0.0599 | 0.0539 | 0.0573 | 0.0694 | 0.0776 |
|        | 3200 | 0.0614 | 0.0502 | 0.0474 | 0.0516 | 0.0576 | 0.0616 | 0.0509 | 0.0492 | 0.0539 | 0.0616 |
|        | 6400 | 0.0635 | 0.0531 | 0.0444 | 0.0457 | 0.0507 | 0.0635 | 0.0532 | 0.0446 | 0.0460 | 0.0514 |
| 2.00   | 100  | 0.2025 | 0.2361 | 0.2608 | 0.2781 | 0.2979 | 0.7914 | 0.9428 | 1.0901 | 1.1901 | 1.2334 |
|        | 200  | 0.1632 | 0.1942 | 0.2133 | 0.2273 | 0.2342 | 0.5299 | 0.7197 | 0.8252 | 0.9139 | 0.9952 |
|        | 400  | 0.1275 | 0.1599 | 0.1708 | 0.1851 | 0.1977 | 0.3153 | 0.4668 | 0.5763 | 0.6576 | 0.7611 |
|        | 800  | 0.0961 | 0.1188 | 0.1384 | 0.1478 | 0.1585 | 0.1683 | 0.2940 | 0.3635 | 0.4359 | 0.4883 |
|        | 1600 | 0.0718 | 0.0910 | 0.1048 | 0.1205 | 0.1262 | 0.1001 | 0.1712 | 0.2161 | 0.2743 | 0.3094 |
|        | 3200 | 0.0582 | 0.0632 | 0.0776 | 0.0871 | 0.0988 | 0.0650 | 0.0915 | 0.1249 | 0.1532 | 0.1800 |
|        | 6400 | 0.0542 | 0.0450 | 0.0533 | 0.0633 | 0.0723 | 0.0547 | 0.0510 | 0.0682 | 0.0848 | 0.1005 |

**Table F.11:** Median Average Square Error for Derivatives of Expected Efficiency  $\mu_\eta(Z)$ , with Heteroskedasticity

| $\rho$ | $n$  | SVKZ   |        |        |        |        | HMS    |        |        |        |        |
|--------|------|--------|--------|--------|--------|--------|--------|--------|--------|--------|--------|
|        |      | (1,1)  | (1,2)  | (2,2)  | (2,3)  | (3,3)  | (1,1)  | (1,2)  | (2,2)  | (2,3)  | (3,3)  |
| 0.00   | 100  | 0.0410 | 0.0786 | 0.1088 | 0.1347 | 0.1612 | 0.0411 | 0.0789 | 0.1106 | 0.1393 | 0.1683 |
|        | 200  | 0.0336 | 0.0702 | 0.0872 | 0.1090 | 0.1251 | 0.0336 | 0.0707 | 0.0879 | 0.1100 | 0.1293 |
|        | 400  | 0.0299 | 0.0506 | 0.0619 | 0.0768 | 0.0889 | 0.0299 | 0.0509 | 0.0622 | 0.0772 | 0.0891 |
|        | 800  | 0.0295 | 0.0432 | 0.0499 | 0.0552 | 0.0632 | 0.0295 | 0.0434 | 0.0499 | 0.0553 | 0.0632 |
|        | 1600 | 0.0327 | 0.0362 | 0.0399 | 0.0388 | 0.0402 | 0.0327 | 0.0362 | 0.0399 | 0.0388 | 0.0402 |
|        | 3200 | 0.0331 | 0.0340 | 0.0304 | 0.0288 | 0.0290 | 0.0331 | 0.0340 | 0.0304 | 0.0288 | 0.0290 |
|        | 6400 | 0.0327 | 0.0320 | 0.0288 | 0.0214 | 0.0204 | 0.0327 | 0.0320 | 0.0288 | 0.0214 | 0.0204 |
| 0.25   | 100  | 0.0453 | 0.0812 | 0.1073 | 0.1508 | 0.1722 | 0.0455 | 0.0826 | 0.1110 | 0.1558 | 0.1854 |
|        | 200  | 0.0347 | 0.0676 | 0.0899 | 0.1126 | 0.1389 | 0.0347 | 0.0688 | 0.0910 | 0.1134 | 0.1414 |
|        | 400  | 0.0298 | 0.0526 | 0.0632 | 0.0789 | 0.0920 | 0.0298 | 0.0527 | 0.0638 | 0.0790 | 0.0928 |
|        | 800  | 0.0292 | 0.0435 | 0.0495 | 0.0567 | 0.0664 | 0.0292 | 0.0438 | 0.0495 | 0.0568 | 0.0664 |
|        | 1600 | 0.0320 | 0.0376 | 0.0405 | 0.0407 | 0.0418 | 0.0320 | 0.0376 | 0.0405 | 0.0407 | 0.0418 |
|        | 3200 | 0.0327 | 0.0341 | 0.0314 | 0.0291 | 0.0289 | 0.0327 | 0.0341 | 0.0314 | 0.0291 | 0.0289 |
|        | 6400 | 0.0322 | 0.0323 | 0.0290 | 0.0215 | 0.0206 | 0.0322 | 0.0323 | 0.0290 | 0.0215 | 0.0206 |
| 0.50   | 100  | 0.0485 | 0.0956 | 0.1258 | 0.1870 | 0.2212 | 0.0495 | 0.1006 | 0.1339 | 0.2040 | 0.2460 |
|        | 200  | 0.0356 | 0.0744 | 0.1011 | 0.1291 | 0.1561 | 0.0357 | 0.0757 | 0.1022 | 0.1315 | 0.1601 |
|        | 400  | 0.0308 | 0.0552 | 0.0740 | 0.0906 | 0.1046 | 0.0308 | 0.0555 | 0.0743 | 0.0909 | 0.1057 |
|        | 800  | 0.0283 | 0.0454 | 0.0512 | 0.0613 | 0.0719 | 0.0283 | 0.0455 | 0.0514 | 0.0614 | 0.0719 |
|        | 1600 | 0.0323 | 0.0384 | 0.0426 | 0.0431 | 0.0461 | 0.0323 | 0.0384 | 0.0426 | 0.0431 | 0.0462 |
|        | 3200 | 0.0329 | 0.0338 | 0.0323 | 0.0310 | 0.0312 | 0.0329 | 0.0338 | 0.0323 | 0.0310 | 0.0313 |
|        | 6400 | 0.0323 | 0.0321 | 0.0287 | 0.0227 | 0.0221 | 0.0323 | 0.0321 | 0.0287 | 0.0227 | 0.0221 |
| 0.75   | 100  | 0.0523 | 0.1188 | 0.1633 | 0.2433 | 0.2841 | 0.0628 | 0.1330 | 0.1998 | 0.3044 | 0.3610 |
|        | 200  | 0.0410 | 0.0990 | 0.1305 | 0.1615 | 0.1970 | 0.0415 | 0.1036 | 0.1329 | 0.1705 | 0.2151 |
|        | 400  | 0.0324 | 0.0635 | 0.0879 | 0.1068 | 0.1299 | 0.0324 | 0.0637 | 0.0882 | 0.1085 | 0.1315 |
|        | 800  | 0.0290 | 0.0504 | 0.0597 | 0.0743 | 0.0850 | 0.0290 | 0.0504 | 0.0599 | 0.0744 | 0.0854 |
|        | 1600 | 0.0328 | 0.0407 | 0.0454 | 0.0502 | 0.0515 | 0.0328 | 0.0407 | 0.0454 | 0.0502 | 0.0518 |
|        | 3200 | 0.0327 | 0.0347 | 0.0348 | 0.0335 | 0.0336 | 0.0327 | 0.0347 | 0.0350 | 0.0335 | 0.0336 |
|        | 6400 | 0.0327 | 0.0325 | 0.0294 | 0.0243 | 0.0244 | 0.0327 | 0.0325 | 0.0294 | 0.0243 | 0.0244 |
| 1.00   | 100  | 0.0621 | 0.1488 | 0.2134 | 0.2925 | 0.3332 | 0.0996 | 0.2125 | 0.3257 | 0.5003 | 0.6213 |
|        | 200  | 0.0528 | 0.1293 | 0.1737 | 0.2251 | 0.2700 | 0.0599 | 0.1454 | 0.1980 | 0.2629 | 0.3237 |
|        | 400  | 0.0370 | 0.0813 | 0.1207 | 0.1472 | 0.1736 | 0.0382 | 0.0830 | 0.1229 | 0.1539 | 0.1836 |
|        | 800  | 0.0311 | 0.0596 | 0.0771 | 0.0940 | 0.1086 | 0.0311 | 0.0599 | 0.0777 | 0.0952 | 0.1108 |
|        | 1600 | 0.0331 | 0.0443 | 0.0554 | 0.0623 | 0.0658 | 0.0331 | 0.0443 | 0.0555 | 0.0626 | 0.0664 |
|        | 3200 | 0.0324 | 0.0366 | 0.0389 | 0.0397 | 0.0405 | 0.0324 | 0.0366 | 0.0390 | 0.0398 | 0.0405 |
|        | 6400 | 0.0329 | 0.0338 | 0.0318 | 0.0276 | 0.0284 | 0.0329 | 0.0338 | 0.0318 | 0.0276 | 0.0284 |
| 2.00   | 100  | 0.0306 | 0.1721 | 0.2567 | 0.3573 | 0.3393 | 0.4477 | 1.0962 | 1.5814 | 2.4811 | 2.7370 |
|        | 200  | 0.0544 | 0.2335 | 0.3046 | 0.4092 | 0.5095 | 0.3087 | 0.8262 | 1.3476 | 1.6593 | 2.4729 |
|        | 400  | 0.0596 | 0.2030 | 0.3085 | 0.4492 | 0.4146 | 0.1898 | 0.5268 | 0.8158 | 1.0988 | 1.5071 |
|        | 800  | 0.0649 | 0.1877 | 0.2363 | 0.3406 | 0.3768 | 0.1117 | 0.3497 | 0.4913 | 0.6653 | 0.7444 |
|        | 1600 | 0.0534 | 0.1380 | 0.1876 | 0.2703 | 0.2838 | 0.0703 | 0.2070 | 0.2792 | 0.3694 | 0.4194 |
|        | 3200 | 0.0420 | 0.0950 | 0.1355 | 0.1739 | 0.1998 | 0.0441 | 0.1121 | 0.1681 | 0.2009 | 0.2323 |
|        | 6400 | 0.0372 | 0.0635 | 0.0966 | 0.1135 | 0.1208 | 0.0372 | 0.0649 | 0.1001 | 0.1205 | 0.1331 |

**Table F.12:** Median Average Square Error for Estimated Marginal Product, with Heteroskedasticity

| $\rho$ | $n$  | SVKZ   |        |        |        |        | HMS    |        |        |        |        |
|--------|------|--------|--------|--------|--------|--------|--------|--------|--------|--------|--------|
|        |      | (1,1)  | (1,2)  | (2,2)  | (2,3)  | (3,3)  | (1,1)  | (1,2)  | (2,2)  | (2,3)  | (3,3)  |
| 0.00   | 100  | 0.1611 | 0.1483 | 0.2695 | 0.2616 | 0.3914 | 0.1611 | 0.1510 | 0.2752 | 0.2649 | 0.4131 |
|        | 200  | 0.1071 | 0.1163 | 0.1858 | 0.2154 | 0.2865 | 0.1071 | 0.1169 | 0.1884 | 0.2163 | 0.2965 |
|        | 400  | 0.0769 | 0.0853 | 0.1541 | 0.1733 | 0.2503 | 0.0769 | 0.0853 | 0.1547 | 0.1733 | 0.2525 |
|        | 800  | 0.0576 | 0.0577 | 0.1178 | 0.1199 | 0.1782 | 0.0576 | 0.0579 | 0.1178 | 0.1201 | 0.1782 |
|        | 1600 | 0.0418 | 0.0410 | 0.0839 | 0.0781 | 0.1132 | 0.0418 | 0.0410 | 0.0839 | 0.0781 | 0.1132 |
|        | 3200 | 0.0421 | 0.0306 | 0.0462 | 0.0577 | 0.0808 | 0.0421 | 0.0306 | 0.0462 | 0.0577 | 0.0808 |
|        | 6400 | 0.0336 | 0.0277 | 0.0360 | 0.0362 | 0.0534 | 0.0336 | 0.0277 | 0.0360 | 0.0362 | 0.0534 |
| 0.25   | 100  | 0.1720 | 0.1616 | 0.2657 | 0.2730 | 0.3777 | 0.1720 | 0.1632 | 0.2758 | 0.2793 | 0.4079 |
|        | 200  | 0.1132 | 0.1196 | 0.2004 | 0.2212 | 0.3178 | 0.1132 | 0.1256 | 0.2022 | 0.2225 | 0.3194 |
|        | 400  | 0.0745 | 0.0831 | 0.1747 | 0.1707 | 0.2548 | 0.0745 | 0.0833 | 0.1783 | 0.1707 | 0.2659 |
|        | 800  | 0.0554 | 0.0633 | 0.1148 | 0.1347 | 0.1807 | 0.0554 | 0.0637 | 0.1157 | 0.1369 | 0.1807 |
|        | 1600 | 0.0423 | 0.0439 | 0.0821 | 0.0862 | 0.1218 | 0.0423 | 0.0439 | 0.0821 | 0.0862 | 0.1218 |
|        | 3200 | 0.0441 | 0.0327 | 0.0477 | 0.0589 | 0.0796 | 0.0441 | 0.0327 | 0.0477 | 0.0589 | 0.0796 |
|        | 6400 | 0.0315 | 0.0283 | 0.0369 | 0.0389 | 0.0563 | 0.0315 | 0.0283 | 0.0369 | 0.0389 | 0.0563 |
| 0.50   | 100  | 0.2023 | 0.1821 | 0.3191 | 0.3537 | 0.4435 | 0.2059 | 0.1966 | 0.3532 | 0.3862 | 0.5297 |
|        | 200  | 0.1247 | 0.1462 | 0.2371 | 0.2225 | 0.3630 | 0.1257 | 0.1482 | 0.2450 | 0.2269 | 0.3914 |
|        | 400  | 0.0744 | 0.0867 | 0.1882 | 0.1885 | 0.2857 | 0.0744 | 0.0875 | 0.1906 | 0.1916 | 0.2892 |
|        | 800  | 0.0637 | 0.0711 | 0.1287 | 0.1559 | 0.2191 | 0.0637 | 0.0714 | 0.1288 | 0.1572 | 0.2194 |
|        | 1600 | 0.0419 | 0.0461 | 0.0963 | 0.0975 | 0.1298 | 0.0419 | 0.0461 | 0.0963 | 0.0975 | 0.1314 |
|        | 3200 | 0.0496 | 0.0358 | 0.0557 | 0.0653 | 0.0869 | 0.0496 | 0.0358 | 0.0557 | 0.0653 | 0.0871 |
|        | 6400 | 0.0317 | 0.0292 | 0.0403 | 0.0415 | 0.0591 | 0.0317 | 0.0292 | 0.0403 | 0.0415 | 0.0591 |
| 0.75   | 100  | 0.2555 | 0.2485 | 0.4034 | 0.4266 | 0.5228 | 0.2973 | 0.2952 | 0.4949 | 0.5301 | 0.6250 |
|        | 200  | 0.1703 | 0.1862 | 0.3299 | 0.2923 | 0.4323 | 0.1732 | 0.2031 | 0.3444 | 0.3131 | 0.5366 |
|        | 400  | 0.0954 | 0.1027 | 0.2389 | 0.2193 | 0.3383 | 0.0954 | 0.1032 | 0.2400 | 0.2283 | 0.3427 |
|        | 800  | 0.0736 | 0.0831 | 0.1605 | 0.1794 | 0.2602 | 0.0736 | 0.0831 | 0.1620 | 0.1808 | 0.2639 |
|        | 1600 | 0.0497 | 0.0496 | 0.1225 | 0.1151 | 0.1613 | 0.0497 | 0.0496 | 0.1225 | 0.1153 | 0.1635 |
|        | 3200 | 0.0527 | 0.0386 | 0.0657 | 0.0760 | 0.1012 | 0.0527 | 0.0386 | 0.0657 | 0.0762 | 0.1012 |
|        | 6400 | 0.0330 | 0.0313 | 0.0464 | 0.0472 | 0.0659 | 0.0330 | 0.0313 | 0.0464 | 0.0472 | 0.0659 |
| 1.00   | 100  | 0.3398 | 0.3178 | 0.5147 | 0.4138 | 0.5521 | 0.4786 | 0.4126 | 0.8098 | 0.6485 | 0.7341 |
|        | 200  | 0.2220 | 0.2615 | 0.4100 | 0.3645 | 0.4973 | 0.2495 | 0.3198 | 0.4983 | 0.4418 | 0.6420 |
|        | 400  | 0.1319 | 0.1440 | 0.3357 | 0.2917 | 0.4269 | 0.1347 | 0.1463 | 0.3543 | 0.3230 | 0.4521 |
|        | 800  | 0.0911 | 0.1060 | 0.2223 | 0.2524 | 0.3377 | 0.0911 | 0.1060 | 0.2252 | 0.2641 | 0.3453 |
|        | 1600 | 0.0568 | 0.0623 | 0.1486 | 0.1386 | 0.1940 | 0.0568 | 0.0623 | 0.1493 | 0.1400 | 0.1993 |
|        | 3200 | 0.0536 | 0.0460 | 0.0840 | 0.0956 | 0.1230 | 0.0536 | 0.0460 | 0.0840 | 0.0956 | 0.1230 |
|        | 6400 | 0.0365 | 0.0352 | 0.0572 | 0.0584 | 0.0760 | 0.0365 | 0.0352 | 0.0572 | 0.0584 | 0.0760 |
| 2.00   | 100  | 0.3916 | 0.4025 | 0.7532 | 0.4992 | 0.7055 | 2.5102 | 1.2524 | 1.5276 | 0.9308 | 0.9905 |
|        | 200  | 0.3673 | 0.3693 | 0.5471 | 0.4675 | 0.5127 | 2.1563 | 1.3826 | 1.4545 | 0.8951 | 0.9614 |
|        | 400  | 0.3448 | 0.2839 | 0.5841 | 0.4649 | 0.6011 | 1.0959 | 0.9290 | 1.3798 | 0.8451 | 0.9953 |
|        | 800  | 0.3194 | 0.2910 | 0.5647 | 0.4399 | 0.5710 | 0.6137 | 0.8006 | 1.2553 | 0.9122 | 0.9232 |
|        | 1600 | 0.2308 | 0.2521 | 0.4977 | 0.4450 | 0.5550 | 0.3051 | 0.4315 | 0.9295 | 0.6785 | 0.8654 |
|        | 3200 | 0.1506 | 0.2004 | 0.3797 | 0.3834 | 0.5072 | 0.1600 | 0.2524 | 0.5303 | 0.5031 | 0.6552 |
|        | 6400 | 0.0892 | 0.0943 | 0.2753 | 0.2419 | 0.3257 | 0.0892 | 0.0992 | 0.3090 | 0.2808 | 0.4229 |

**Table F.13:** Differences in IMSE for Frontier Estimates, Exponential versus Half-Normal Inefficiency, No Heteroskedasticity

| $\rho$ | $n$  | SVKZ   |         |         |         |         | HMS    |         |         |         |        |
|--------|------|--------|---------|---------|---------|---------|--------|---------|---------|---------|--------|
|        |      | (1,1)  | (1,2)   | (2,2)   | (2,3)   | (3,3)   | (1,1)  | (1,2)   | (2,2)   | (2,3)   | (3,3)  |
| 0.00   | 100  | 0.0376 | 0.0241  | 0.0266  | 0.0202  | 0.0208  | 0.0558 | 0.0652  | 0.0898  | 0.0940  | 0.1035 |
|        | 200  | 0.0481 | 0.0347  | 0.0335  | 0.0327  | 0.0294  | 0.0563 | 0.0537  | 0.0664  | 0.0780  | 0.0821 |
|        | 400  | 0.0513 | 0.0392  | 0.0399  | 0.0405  | 0.0424  | 0.0521 | 0.0447  | 0.0540  | 0.0615  | 0.0716 |
|        | 800  | 0.0579 | 0.0438  | 0.0402  | 0.0454  | 0.0481  | 0.0581 | 0.0453  | 0.0438  | 0.0551  | 0.0603 |
|        | 1600 | 0.0630 | 0.0481  | 0.0416  | 0.0429  | 0.0462  | 0.0631 | 0.0483  | 0.0425  | 0.0451  | 0.0494 |
|        | 3200 | 0.0646 | 0.0539  | 0.0434  | 0.0424  | 0.0446  | 0.0646 | 0.0540  | 0.0435  | 0.0428  | 0.0452 |
|        | 6400 | 0.0668 | 0.0578  | 0.0475  | 0.0422  | 0.0438  | 0.0668 | 0.0578  | 0.0475  | 0.0423  | 0.0439 |
| 0.25   | 100  | 0.0360 | 0.0219  | 0.0250  | 0.0197  | 0.0205  | 0.0562 | 0.0668  | 0.0920  | 0.0979  | 0.1056 |
|        | 200  | 0.0471 | 0.0336  | 0.0320  | 0.0320  | 0.0293  | 0.0558 | 0.0550  | 0.0686  | 0.0807  | 0.0867 |
|        | 400  | 0.0506 | 0.0383  | 0.0393  | 0.0391  | 0.0415  | 0.0517 | 0.0449  | 0.0542  | 0.0614  | 0.0741 |
|        | 800  | 0.0571 | 0.0432  | 0.0396  | 0.0448  | 0.0482  | 0.0573 | 0.0446  | 0.0438  | 0.0555  | 0.0607 |
|        | 1600 | 0.0626 | 0.0477  | 0.0409  | 0.0426  | 0.0458  | 0.0627 | 0.0479  | 0.0418  | 0.0448  | 0.0493 |
|        | 3200 | 0.0644 | 0.0533  | 0.0426  | 0.0420  | 0.0442  | 0.0644 | 0.0533  | 0.0427  | 0.0424  | 0.0447 |
|        | 6400 | 0.0668 | 0.0573  | 0.0467  | 0.0416  | 0.0432  | 0.0668 | 0.0573  | 0.0467  | 0.0416  | 0.0433 |
| 0.50   | 100  | 0.0303 | 0.0177  | 0.0225  | 0.0182  | 0.0205  | 0.0588 | 0.0740  | 0.1028  | 0.1057  | 0.1163 |
|        | 200  | 0.0438 | 0.0289  | 0.0282  | 0.0289  | 0.0266  | 0.0558 | 0.0579  | 0.0750  | 0.0896  | 0.0971 |
|        | 400  | 0.0485 | 0.0344  | 0.0356  | 0.0357  | 0.0387  | 0.0503 | 0.0450  | 0.0561  | 0.0648  | 0.0799 |
|        | 800  | 0.0553 | 0.0406  | 0.0368  | 0.0425  | 0.0460  | 0.0556 | 0.0426  | 0.0436  | 0.0563  | 0.0623 |
|        | 1600 | 0.0612 | 0.0455  | 0.0385  | 0.0409  | 0.0440  | 0.0614 | 0.0459  | 0.0401  | 0.0441  | 0.0489 |
|        | 3200 | 0.0635 | 0.0512  | 0.0401  | 0.0403  | 0.0427  | 0.0635 | 0.0512  | 0.0402  | 0.0409  | 0.0436 |
|        | 6400 | 0.0662 | 0.0556  | 0.0441  | 0.0393  | 0.0415  | 0.0662 | 0.0556  | 0.0442  | 0.0394  | 0.0416 |
| 0.75   | 100  | 0.0239 | 0.0169  | 0.0236  | 0.0204  | 0.0258  | 0.0648 | 0.0890  | 0.1223  | 0.1238  | 0.1394 |
|        | 200  | 0.0370 | 0.0209  | 0.0227  | 0.0256  | 0.0246  | 0.0563 | 0.0653  | 0.0837  | 0.1037  | 0.1129 |
|        | 400  | 0.0434 | 0.0255  | 0.0278  | 0.0290  | 0.0336  | 0.0481 | 0.0467  | 0.0594  | 0.0716  | 0.0893 |
|        | 800  | 0.0519 | 0.0338  | 0.0287  | 0.0359  | 0.0403  | 0.0526 | 0.0402  | 0.0435  | 0.0592  | 0.0666 |
|        | 1600 | 0.0589 | 0.0407  | 0.0319  | 0.0351  | 0.0388  | 0.0592 | 0.0419  | 0.0364  | 0.0426  | 0.0488 |
|        | 3200 | 0.0619 | 0.0472  | 0.0348  | 0.0356  | 0.0384  | 0.0619 | 0.0472  | 0.0353  | 0.0375  | 0.0413 |
|        | 6400 | 0.0652 | 0.0525  | 0.0393  | 0.0346  | 0.0374  | 0.0652 | 0.0525  | 0.0394  | 0.0349  | 0.0380 |
| 1.00   | 100  | 0.0225 | 0.0207  | 0.0320  | 0.0278  | 0.0359  | 0.0772 | 0.1145  | 0.1579  | 0.1541  | 0.1776 |
|        | 200  | 0.0274 | 0.0161  | 0.0220  | 0.0275  | 0.0271  | 0.0609 | 0.0753  | 0.1000  | 0.1272  | 0.1403 |
|        | 400  | 0.0321 | 0.0147  | 0.0210  | 0.0245  | 0.0307  | 0.0458 | 0.0501  | 0.0675  | 0.0842  | 0.1068 |
|        | 800  | 0.0446 | 0.0194  | 0.0154  | 0.0247  | 0.0319  | 0.0480 | 0.0376  | 0.0444  | 0.0634  | 0.0739 |
|        | 1600 | 0.0546 | 0.0293  | 0.0166  | 0.0229  | 0.0286  | 0.0553 | 0.0355  | 0.0327  | 0.0414  | 0.0491 |
|        | 3200 | 0.0594 | 0.0396  | 0.0219  | 0.0236  | 0.0275  | 0.0594 | 0.0405  | 0.0270  | 0.0326  | 0.0381 |
|        | 6400 | 0.0635 | 0.0474  | 0.0304  | 0.0243  | 0.0282  | 0.0635 | 0.0474  | 0.0310  | 0.0274  | 0.0320 |
| 2.00   | 100  | 0.0752 | 0.0840  | 0.1037  | 0.1077  | 0.1206  | 0.3209 | 0.4514  | 0.5414  | 0.5676  | 0.5971 |
|        | 200  | 0.0554 | 0.0643  | 0.0734  | 0.0871  | 0.0886  | 0.1888 | 0.2968  | 0.3696  | 0.4172  | 0.4606 |
|        | 400  | 0.0325 | 0.0411  | 0.0589  | 0.0658  | 0.0757  | 0.1146 | 0.1801  | 0.2339  | 0.2840  | 0.3404 |
|        | 800  | 0.0147 | 0.0174  | 0.0285  | 0.0402  | 0.0517  | 0.0506 | 0.0773  | 0.1144  | 0.1511  | 0.1992 |
|        | 1600 | 0.0017 | -0.0143 | 0.0001  | 0.0188  | 0.0313  | 0.0219 | 0.0124  | 0.0393  | 0.0851  | 0.1106 |
|        | 3200 | 0.0149 | -0.0363 | -0.0332 | -0.0120 | 0.0006  | 0.0315 | -0.0132 | -0.0133 | 0.0159  | 0.0369 |
|        | 6400 | 0.0333 | -0.0394 | -0.0642 | -0.0468 | -0.0252 | 0.0427 | -0.0093 | -0.0388 | -0.0246 | 0.0011 |

**Table F.14:** Differences in IMSE for Frontier Estimates, Exponential versus Half-Normal Inefficiency, Heteroskedastic Inefficiency and Noise

| $\rho$ | $n$  | SVKZ   |         |         |         |         | HMS    |         |         |         |        |
|--------|------|--------|---------|---------|---------|---------|--------|---------|---------|---------|--------|
|        |      | (1,1)  | (1,2)   | (2,2)   | (2,3)   | (3,3)   | (1,1)  | (1,2)   | (2,2)   | (2,3)   | (3,3)  |
| 0.00   | 100  | 0.0376 | 0.0305  | 0.0226  | 0.0219  | 0.0138  | 0.0598 | 0.0814  | 0.0893  | 0.0979  | 0.1070 |
|        | 200  | 0.0470 | 0.0394  | 0.0368  | 0.0368  | 0.0331  | 0.0596 | 0.0711  | 0.0775  | 0.0861  | 0.0942 |
|        | 400  | 0.0528 | 0.0402  | 0.0390  | 0.0426  | 0.0422  | 0.0564 | 0.0521  | 0.0571  | 0.0679  | 0.0728 |
|        | 800  | 0.0576 | 0.0454  | 0.0421  | 0.0449  | 0.0490  | 0.0587 | 0.0485  | 0.0494  | 0.0547  | 0.0650 |
|        | 1600 | 0.0623 | 0.0510  | 0.0421  | 0.0443  | 0.0478  | 0.0624 | 0.0519  | 0.0440  | 0.0471  | 0.0526 |
|        | 3200 | 0.0648 | 0.0549  | 0.0451  | 0.0436  | 0.0472  | 0.0650 | 0.0551  | 0.0454  | 0.0442  | 0.0490 |
|        | 6400 | 0.0671 | 0.0592  | 0.0485  | 0.0436  | 0.0456  | 0.0671 | 0.0592  | 0.0486  | 0.0438  | 0.0459 |
| 0.25   | 100  | 0.0364 | 0.0288  | 0.0216  | 0.0225  | 0.0147  | 0.0612 | 0.0826  | 0.0913  | 0.1045  | 0.1137 |
|        | 200  | 0.0461 | 0.0374  | 0.0358  | 0.0351  | 0.0312  | 0.0592 | 0.0704  | 0.0786  | 0.0879  | 0.0975 |
|        | 400  | 0.0523 | 0.0397  | 0.0390  | 0.0413  | 0.0420  | 0.0562 | 0.0528  | 0.0581  | 0.0693  | 0.0754 |
|        | 800  | 0.0572 | 0.0447  | 0.0418  | 0.0441  | 0.0488  | 0.0583 | 0.0483  | 0.0500  | 0.0550  | 0.0655 |
|        | 1600 | 0.0620 | 0.0502  | 0.0414  | 0.0442  | 0.0475  | 0.0620 | 0.0512  | 0.0434  | 0.0473  | 0.0527 |
|        | 3200 | 0.0645 | 0.0542  | 0.0445  | 0.0432  | 0.0470  | 0.0646 | 0.0545  | 0.0448  | 0.0439  | 0.0489 |
|        | 6400 | 0.0667 | 0.0586  | 0.0477  | 0.0431  | 0.0451  | 0.0667 | 0.0586  | 0.0478  | 0.0432  | 0.0453 |
| 0.50   | 100  | 0.0318 | 0.0246  | 0.0190  | 0.0238  | 0.0157  | 0.0656 | 0.0883  | 0.0995  | 0.1166  | 0.1255 |
|        | 200  | 0.0428 | 0.0334  | 0.0319  | 0.0317  | 0.0274  | 0.0586 | 0.0734  | 0.0832  | 0.0946  | 0.1055 |
|        | 400  | 0.0501 | 0.0365  | 0.0358  | 0.0379  | 0.0387  | 0.0551 | 0.0537  | 0.0608  | 0.0738  | 0.0801 |
|        | 800  | 0.0558 | 0.0422  | 0.0393  | 0.0413  | 0.0469  | 0.0569 | 0.0471  | 0.0500  | 0.0558  | 0.0684 |
|        | 1600 | 0.0608 | 0.0478  | 0.0391  | 0.0427  | 0.0460  | 0.0609 | 0.0491  | 0.0418  | 0.0472  | 0.0526 |
|        | 3200 | 0.0636 | 0.0521  | 0.0423  | 0.0414  | 0.0456  | 0.0637 | 0.0524  | 0.0430  | 0.0424  | 0.0481 |
|        | 6400 | 0.0659 | 0.0569  | 0.0451  | 0.0409  | 0.0437  | 0.0659 | 0.0569  | 0.0453  | 0.0411  | 0.0441 |
| 0.75   | 100  | 0.0254 | 0.0224  | 0.0194  | 0.0271  | 0.0208  | 0.0739 | 0.0993  | 0.1162  | 0.1404  | 0.1502 |
|        | 200  | 0.0360 | 0.0265  | 0.0269  | 0.0282  | 0.0250  | 0.0592 | 0.0790  | 0.0929  | 0.1074  | 0.1215 |
|        | 400  | 0.0449 | 0.0285  | 0.0292  | 0.0314  | 0.0326  | 0.0529 | 0.0553  | 0.0660  | 0.0806  | 0.0876 |
|        | 800  | 0.0527 | 0.0355  | 0.0326  | 0.0344  | 0.0415  | 0.0545 | 0.0446  | 0.0503  | 0.0587  | 0.0739 |
|        | 1600 | 0.0584 | 0.0426  | 0.0329  | 0.0376  | 0.0408  | 0.0587 | 0.0451  | 0.0384  | 0.0466  | 0.0529 |
|        | 3200 | 0.0620 | 0.0481  | 0.0371  | 0.0368  | 0.0416  | 0.0621 | 0.0487  | 0.0388  | 0.0393  | 0.0460 |
|        | 6400 | 0.0645 | 0.0537  | 0.0401  | 0.0362  | 0.0396  | 0.0645 | 0.0538  | 0.0403  | 0.0367  | 0.0406 |
| 1.00   | 100  | 0.0244 | 0.0269  | 0.0278  | 0.0352  | 0.0332  | 0.0893 | 0.1236  | 0.1506  | 0.1795  | 0.1936 |
|        | 200  | 0.0273 | 0.0223  | 0.0254  | 0.0302  | 0.0275  | 0.0612 | 0.0888  | 0.1102  | 0.1267  | 0.1512 |
|        | 400  | 0.0343 | 0.0181  | 0.0225  | 0.0262  | 0.0309  | 0.0511 | 0.0596  | 0.0745  | 0.0910  | 0.1066 |
|        | 800  | 0.0457 | 0.0220  | 0.0203  | 0.0240  | 0.0332  | 0.0502 | 0.0422  | 0.0525  | 0.0620  | 0.0812 |
|        | 1600 | 0.0539 | 0.0314  | 0.0186  | 0.0260  | 0.0310  | 0.0550 | 0.0392  | 0.0347  | 0.0464  | 0.0542 |
|        | 3200 | 0.0591 | 0.0408  | 0.0252  | 0.0254  | 0.0316  | 0.0593 | 0.0426  | 0.0321  | 0.0348  | 0.0428 |
|        | 6400 | 0.0624 | 0.0485  | 0.0312  | 0.0261  | 0.0311  | 0.0624 | 0.0488  | 0.0326  | 0.0293  | 0.0354 |
| 2.00   | 100  | 0.0756 | 0.0937  | 0.1046  | 0.1112  | 0.1157  | 0.3810 | 0.4464  | 0.5450  | 0.5904  | 0.6087 |
|        | 200  | 0.0566 | 0.0690  | 0.0832  | 0.0916  | 0.0875  | 0.2324 | 0.3264  | 0.3800  | 0.4452  | 0.4710 |
|        | 400  | 0.0345 | 0.0505  | 0.0589  | 0.0672  | 0.0754  | 0.1195 | 0.1906  | 0.2578  | 0.3067  | 0.3658 |
|        | 800  | 0.0137 | 0.0155  | 0.0327  | 0.0424  | 0.0530  | 0.0406 | 0.0914  | 0.1305  | 0.1739  | 0.2028 |
|        | 1600 | 0.0041 | -0.0109 | 0.0005  | 0.0237  | 0.0314  | 0.0277 | 0.0219  | 0.0448  | 0.0926  | 0.1199 |
|        | 3200 | 0.0125 | -0.0322 | -0.0296 | -0.0120 | 0.0055  | 0.0304 | -0.0036 | -0.0075 | 0.0211  | 0.0408 |
|        | 6400 | 0.0285 | -0.0341 | -0.0593 | -0.0440 | -0.0211 | 0.0386 | -0.0035 | -0.0331 | -0.0200 | 0.0028 |



**Table F.15:** Differences in Median Average Square Error for Derivatives of Expected Efficiency  $\mu_\eta(Z)$ , Exponential versus Half-Normal Inefficiency, with Heteroskedasticity

| $\rho$ | $n$  | SVKZ   |        |        |        |        | HMS     |         |         |         |         |
|--------|------|--------|--------|--------|--------|--------|---------|---------|---------|---------|---------|
|        |      | (1,1)  | (1,2)  | (2,2)  | (2,3)  | (3,3)  | (1,1)   | (1,2)   | (2,2)   | (2,3)   | (3,3)   |
| 0.00   | 100  | 0.0228 | 0.0455 | 0.0629 | 0.0776 | 0.0950 | 0.0228  | 0.0439  | 0.0598  | 0.0750  | 0.0899  |
|        | 200  | 0.0166 | 0.0418 | 0.0550 | 0.0725 | 0.0848 | 0.0166  | 0.0419  | 0.0554  | 0.0735  | 0.0875  |
|        | 400  | 0.0136 | 0.0287 | 0.0396 | 0.0538 | 0.0633 | 0.0136  | 0.0290  | 0.0398  | 0.0543  | 0.0632  |
|        | 800  | 0.0119 | 0.0247 | 0.0315 | 0.0384 | 0.0465 | 0.0119  | 0.0249  | 0.0315  | 0.0385  | 0.0464  |
|        | 1600 | 0.0150 | 0.0186 | 0.0243 | 0.0264 | 0.0281 | 0.0150  | 0.0186  | 0.0243  | 0.0264  | 0.0281  |
|        | 3200 | 0.0152 | 0.0176 | 0.0170 | 0.0188 | 0.0202 | 0.0152  | 0.0176  | 0.0170  | 0.0188  | 0.0202  |
|        | 6400 | 0.0152 | 0.0156 | 0.0159 | 0.0127 | 0.0127 | 0.0152  | 0.0156  | 0.0159  | 0.0127  | 0.0127  |
| 0.25   | 100  | 0.0265 | 0.0418 | 0.0571 | 0.0884 | 0.1011 | 0.0258  | 0.0413  | 0.0545  | 0.0831  | 0.0900  |
|        | 200  | 0.0168 | 0.0372 | 0.0545 | 0.0732 | 0.0922 | 0.0168  | 0.0381  | 0.0547  | 0.0729  | 0.0922  |
|        | 400  | 0.0130 | 0.0297 | 0.0386 | 0.0533 | 0.0628 | 0.0130  | 0.0298  | 0.0393  | 0.0531  | 0.0633  |
|        | 800  | 0.0116 | 0.0237 | 0.0304 | 0.0385 | 0.0483 | 0.0116  | 0.0240  | 0.0304  | 0.0385  | 0.0483  |
|        | 1600 | 0.0148 | 0.0202 | 0.0246 | 0.0275 | 0.0287 | 0.0148  | 0.0202  | 0.0246  | 0.0275  | 0.0287  |
|        | 3200 | 0.0149 | 0.0176 | 0.0177 | 0.0186 | 0.0197 | 0.0149  | 0.0176  | 0.0177  | 0.0186  | 0.0197  |
|        | 6400 | 0.0145 | 0.0159 | 0.0160 | 0.0126 | 0.0125 | 0.0145  | 0.0159  | 0.0160  | 0.0126  | 0.0125  |
| 0.50   | 100  | 0.0266 | 0.0444 | 0.0600 | 0.1020 | 0.1369 | 0.0231  | 0.0371  | 0.0488  | 0.0911  | 0.0986  |
|        | 200  | 0.0160 | 0.0344 | 0.0548 | 0.0746 | 0.0899 | 0.0157  | 0.0343  | 0.0528  | 0.0716  | 0.0837  |
|        | 400  | 0.0130 | 0.0282 | 0.0408 | 0.0558 | 0.0647 | 0.0130  | 0.0281  | 0.0405  | 0.0549  | 0.0654  |
|        | 800  | 0.0106 | 0.0236 | 0.0285 | 0.0371 | 0.0478 | 0.0106  | 0.0237  | 0.0286  | 0.0372  | 0.0476  |
|        | 1600 | 0.0150 | 0.0203 | 0.0249 | 0.0272 | 0.0301 | 0.0150  | 0.0203  | 0.0249  | 0.0272  | 0.0302  |
|        | 3200 | 0.0150 | 0.0168 | 0.0178 | 0.0186 | 0.0198 | 0.0150  | 0.0168  | 0.0179  | 0.0186  | 0.0199  |
|        | 6400 | 0.0147 | 0.0158 | 0.0152 | 0.0129 | 0.0126 | 0.0147  | 0.0158  | 0.0152  | 0.0129  | 0.0126  |
| 0.75   | 100  | 0.0255 | 0.0615 | 0.0805 | 0.1398 | 0.1752 | 0.0165  | 0.0284  | 0.0515  | 0.1025  | 0.0781  |
|        | 200  | 0.0146 | 0.0401 | 0.0661 | 0.0789 | 0.1042 | 0.0131  | 0.0305  | 0.0428  | 0.0650  | 0.0801  |
|        | 400  | 0.0134 | 0.0272 | 0.0369 | 0.0510 | 0.0668 | 0.0132  | 0.0246  | 0.0324  | 0.0452  | 0.0589  |
|        | 800  | 0.0110 | 0.0232 | 0.0273 | 0.0352 | 0.0447 | 0.0110  | 0.0231  | 0.0265  | 0.0341  | 0.0446  |
|        | 1600 | 0.0158 | 0.0201 | 0.0223 | 0.0262 | 0.0270 | 0.0158  | 0.0201  | 0.0222  | 0.0260  | 0.0266  |
|        | 3200 | 0.0148 | 0.0169 | 0.0175 | 0.0171 | 0.0166 | 0.0148  | 0.0169  | 0.0177  | 0.0170  | 0.0165  |
|        | 6400 | 0.0150 | 0.0159 | 0.0148 | 0.0118 | 0.0114 | 0.0150  | 0.0159  | 0.0148  | 0.0118  | 0.0114  |
| 1.00   | 100  | 0.0362 | 0.0816 | 0.1233 | 0.1770 | 0.2143 | 0.0229  | 0.0278  | 0.0509  | 0.1128  | 0.1711  |
|        | 200  | 0.0213 | 0.0551 | 0.0888 | 0.1158 | 0.1593 | 0.0071  | 0.0152  | 0.0168  | 0.0277  | 0.0315  |
|        | 400  | 0.0106 | 0.0319 | 0.0469 | 0.0551 | 0.0774 | 0.0074  | 0.0086  | 0.0194  | 0.0274  | 0.0381  |
|        | 800  | 0.0116 | 0.0179 | 0.0219 | 0.0318 | 0.0408 | 0.0113  | 0.0146  | 0.0099  | 0.0151  | 0.0288  |
|        | 1600 | 0.0163 | 0.0156 | 0.0157 | 0.0176 | 0.0209 | 0.0163  | 0.0155  | 0.0140  | 0.0154  | 0.0173  |
|        | 3200 | 0.0142 | 0.0154 | 0.0134 | 0.0103 | 0.0086 | 0.0142  | 0.0154  | 0.0134  | 0.0097  | 0.0079  |
|        | 6400 | 0.0151 | 0.0160 | 0.0137 | 0.0080 | 0.0066 | 0.0151  | 0.0160  | 0.0137  | 0.0079  | 0.0061  |
| 2.00   | 100  | 0.0270 | 0.1689 | 0.2543 | 0.3560 | 0.3384 | 0.1617  | 0.3145  | 0.4930  | 1.0013  | 0.9163  |
|        | 200  | 0.0508 | 0.2303 | 0.3022 | 0.3424 | 0.5087 | 0.0421  | 0.0880  | 0.3331  | 0.2509  | 0.5895  |
|        | 400  | 0.0475 | 0.1819 | 0.2655 | 0.3572 | 0.3933 | -0.0112 | -0.0246 | -0.0253 | -0.0649 | 0.0642  |
|        | 800  | 0.0543 | 0.1845 | 0.2339 | 0.3393 | 0.3028 | -0.0492 | -0.0514 | -0.2450 | -0.3617 | -0.6590 |
|        | 1600 | 0.0349 | 0.1348 | 0.1852 | 0.2690 | 0.2036 | -0.0375 | -0.2241 | -0.2758 | -0.4844 | -0.4152 |
|        | 3200 | 0.0154 | 0.0917 | 0.1332 | 0.1726 | 0.1990 | -0.0108 | -0.1745 | -0.3034 | -0.5480 | -0.5934 |
|        | 6400 | 0.0124 | 0.0191 | 0.0943 | 0.1122 | 0.1200 | 0.0074  | -0.1080 | -0.2986 | -0.4505 | -0.5498 |

**Table F.16:** Differences in Median Average Square Error for Estimated Marginal Product, Exponential versus Half-Normal Inefficiency, with Heteroskedasticity

| $\rho$ | $n$  | SVKZ    |         |         |         |         | HMS     |         |         |         |         |
|--------|------|---------|---------|---------|---------|---------|---------|---------|---------|---------|---------|
|        |      | (1,1)   | (1,2)   | (2,2)   | (2,3)   | (3,3)   | (1,1)   | (1,2)   | (2,2)   | (2,3)   | (3,3)   |
| 0.00   | 100  | -0.0423 | 0.0049  | -0.0190 | -0.0121 | -0.0263 | -0.0425 | -0.0007 | -0.0369 | -0.0281 | -0.0676 |
|        | 200  | -0.0136 | 0.0297  | 0.0111  | 0.0205  | -0.0183 | -0.0136 | 0.0285  | 0.0111  | 0.0214  | -0.0222 |
|        | 400  | 0.0022  | 0.0264  | 0.0144  | 0.0240  | 0.0091  | 0.0022  | 0.0267  | 0.0144  | 0.0244  | 0.0077  |
|        | 800  | 0.0103  | 0.0282  | 0.0148  | 0.0193  | 0.0103  | 0.0103  | 0.0284  | 0.0148  | 0.0194  | 0.0099  |
|        | 1600 | 0.0189  | 0.0260  | 0.0210  | 0.0155  | 0.0077  | 0.0189  | 0.0260  | 0.0210  | 0.0155  | 0.0077  |
|        | 3200 | 0.0233  | 0.0261  | 0.0189  | 0.0164  | 0.0077  | 0.0233  | 0.0261  | 0.0189  | 0.0164  | 0.0076  |
|        | 6400 | 0.0256  | 0.0256  | 0.0205  | 0.0134  | 0.0056  | 0.0256  | 0.0256  | 0.0205  | 0.0134  | 0.0056  |
| 0.25   | 100  | -0.0430 | 0.0064  | -0.0397 | 0.0048  | -0.0467 | -0.0434 | -0.0009 | -0.0593 | -0.0125 | -0.1020 |
|        | 200  | -0.0195 | 0.0176  | 0.0065  | 0.0129  | -0.0144 | -0.0199 | 0.0183  | 0.0051  | 0.0112  | -0.0219 |
|        | 400  | -0.0012 | 0.0286  | 0.0046  | 0.0195  | 0.0060  | -0.0012 | 0.0287  | 0.0053  | 0.0185  | 0.0048  |
|        | 800  | 0.0099  | 0.0278  | 0.0138  | 0.0202  | 0.0112  | 0.0099  | 0.0281  | 0.0139  | 0.0202  | 0.0092  |
|        | 1600 | 0.0183  | 0.0273  | 0.0200  | 0.0188  | 0.0016  | 0.0183  | 0.0273  | 0.0200  | 0.0188  | 0.0012  |
|        | 3200 | 0.0212  | 0.0254  | 0.0190  | 0.0156  | 0.0057  | 0.0212  | 0.0254  | 0.0190  | 0.0156  | 0.0057  |
|        | 6400 | 0.0246  | 0.0252  | 0.0207  | 0.0137  | 0.0043  | 0.0246  | 0.0252  | 0.0207  | 0.0137  | 0.0043  |
| 0.50   | 100  | -0.0585 | -0.0016 | -0.0800 | 0.0023  | -0.0364 | -0.0724 | -0.0313 | -0.1234 | -0.0705 | -0.1476 |
|        | 200  | -0.0373 | 0.0024  | -0.0188 | -0.0046 | -0.0418 | -0.0376 | 0.0008  | -0.0260 | -0.0230 | -0.0813 |
|        | 400  | -0.0045 | 0.0193  | -0.0128 | 0.0055  | -0.0227 | -0.0045 | 0.0191  | -0.0137 | 0.0013  | -0.0254 |
|        | 800  | 0.0077  | 0.0244  | 0.0044  | 0.0132  | -0.0029 | 0.0077  | 0.0245  | 0.0045  | 0.0129  | -0.0038 |
|        | 1600 | 0.0170  | 0.0266  | 0.0171  | 0.0125  | -0.0073 | 0.0170  | 0.0266  | 0.0171  | 0.0123  | -0.0080 |
|        | 3200 | 0.0197  | 0.0235  | 0.0185  | 0.0125  | 0.0014  | 0.0197  | 0.0235  | 0.0185  | 0.0125  | 0.0016  |
|        | 6400 | 0.0245  | 0.0243  | 0.0193  | 0.0125  | 0.0014  | 0.0245  | 0.0243  | 0.0193  | 0.0125  | 0.0012  |
| 0.75   | 100  | -0.0996 | 0.0059  | -0.0625 | 0.0278  | -0.0429 | -0.1606 | -0.0896 | -0.2872 | -0.1351 | -0.2722 |
|        | 200  | -0.0640 | -0.0375 | -0.0477 | -0.0237 | -0.0537 | -0.0735 | -0.0679 | -0.1446 | -0.1107 | -0.2162 |
|        | 400  | -0.0192 | 0.0026  | -0.0498 | -0.0227 | -0.0622 | -0.0192 | -0.0042 | -0.0733 | -0.0593 | -0.1229 |
|        | 800  | -0.0014 | 0.0169  | -0.0202 | -0.0148 | -0.0465 | -0.0016 | 0.0164  | -0.0221 | -0.0219 | -0.0506 |
|        | 1600 | 0.0142  | 0.0228  | 0.0021  | 0.0044  | -0.0282 | 0.0142  | 0.0228  | 0.0018  | 0.0036  | -0.0317 |
|        | 3200 | 0.0163  | 0.0229  | 0.0141  | 0.0042  | -0.0113 | 0.0163  | 0.0229  | 0.0143  | 0.0041  | -0.0121 |
|        | 6400 | 0.0240  | 0.0232  | 0.0176  | 0.0087  | -0.0088 | 0.0240  | 0.0232  | 0.0176  | 0.0087  | -0.0088 |
| 1.00   | 100  | -0.0883 | -0.0161 | -0.0543 | 0.0571  | -0.0246 | -0.3229 | -0.1808 | -0.5394 | -0.1512 | -0.2786 |
|        | 200  | -0.1180 | -0.0139 | -0.0308 | -0.0024 | -0.0189 | -0.2065 | -0.1977 | -0.4095 | -0.2933 | -0.4018 |
|        | 400  | -0.0488 | -0.0077 | -0.0734 | -0.0425 | -0.0851 | -0.0644 | -0.0795 | -0.2567 | -0.1666 | -0.3226 |
|        | 800  | -0.0218 | -0.0130 | -0.0698 | -0.0432 | -0.1114 | -0.0228 | -0.0236 | -0.1249 | -0.1370 | -0.1671 |
|        | 1600 | 0.0079  | 0.0129  | -0.0350 | -0.0295 | -0.0728 | 0.0079  | 0.0129  | -0.0445 | -0.0470 | -0.1060 |
|        | 3200 | 0.0130  | 0.0210  | -0.0033 | -0.0233 | -0.0435 | 0.0130  | 0.0210  | -0.0035 | -0.0273 | -0.0479 |
|        | 6400 | 0.0218  | 0.0220  | 0.0123  | -0.0037 | -0.0362 | 0.0218  | 0.0220  | 0.0123  | -0.0038 | -0.0387 |
| 2.00   | 100  | -0.1503 | 0.0115  | -0.1673 | 0.0422  | -0.1577 | -1.0666 | 0.1746  | -0.0748 | 1.6202  | 1.7721  |
|        | 200  | -0.1337 | 0.1135  | 0.0553  | 0.1223  | 0.1884  | -1.3591 | -0.1784 | 0.0740  | 0.7624  | 1.4163  |
|        | 400  | -0.0939 | 0.1024  | 0.1122  | 0.2812  | 0.1672  | -0.9697 | -0.4541 | -0.7414 | 0.2563  | 0.4037  |
|        | 800  | -0.0471 | 0.1324  | 0.1343  | 0.2420  | 0.2221  | -0.8310 | -0.4206 | -0.8843 | -0.1412 | -0.2941 |
|        | 1600 | -0.0515 | 0.1015  | 0.1346  | 0.2187  | 0.1622  | -0.4349 | -0.4583 | -1.0620 | -0.3462 | -0.5904 |
|        | 3200 | -0.0516 | 0.0484  | 0.1072  | 0.1522  | 0.1521  | -0.1497 | -0.3301 | -0.8486 | -0.6157 | -0.8571 |
|        | 6400 | -0.0195 | 0.0099  | 0.0764  | 0.1031  | 0.1008  | -0.0326 | -0.2514 | -0.7884 | -0.5125 | -0.7674 |

## G Additional Results on the Efficiency of US Banks

### G.1 Results Mentioned in Section 4

As noted in Section 4, summary statistics for the original  $p = 5$  input variables  $X_j$ ,  $j \in \{1, 2, 3, 4, 5\}$  and  $q = 3$  output variables  $Y_j$ ,  $j \in \{1, 2, 3\}$  used in our empirical illustration appear below in Table G.1. As expected with banking data, the marginal distributions in the original  $(x, y)$ -space show evidence of substantial skewness to the right. Also shown in Table G.1 are summary statistics for the standardized and reduced-dimensional inputs  $X_1^*$ ,  $X_2^*$  and  $X_3^*$  as well as the standardized and reduced-dimensional output variables  $Y_1^*$  and  $Y_2^*$  discussed in Section 4. The last three rows of Table G.1 show summary statistics for  $Z$  and  $U$  after applying the rotation matrix  $R_d$  to the reduced dimensional data  $(X_1^*, X_2^*, X_3^*, Y_1^*, Y_2^*)$  as described in Section 4.

Table G.2 gives bandwidths optimized via leave-one-out cross validation for the regression of  $U$  on  $Z$  as well as the regression of squared and cubed residuals from this regression on  $Z$ . Table G.2 also shows bounds placed on the bandwidths as discussed in Section 4.

**Table G.1:** Summary Statistics for Data Used in Empirical Example

|         | Minimum                 | 1st Quartile             | Median                   | Mean                      | 3rd Quartile             | Maximum                 |
|---------|-------------------------|--------------------------|--------------------------|---------------------------|--------------------------|-------------------------|
| $X_1$   | $4.2558 \times 10^2$    | $6.0741 \times 10^4$     | $1.2509 \times 10^5$     | $1.6003 \times 10^6$      | $2.8237 \times 10^5$     | $2.2089 \times 10^9$    |
| $X_2$   | 1.0000                  | $1.8500 \times 10^1$     | $3.6500 \times 10^1$     | $2.9020 \times 10^2$      | $7.9500 \times 10^1$     | $2.3955 \times 10^5$    |
| $X_3$   | $8.6466 \times 10^{-1}$ | $7.6941 \times 10^2$     | $2.3102 \times 10^3$     | $1.7352 \times 10^4$      | $5.8730 \times 10^3$     | $2.0098 \times 10^7$    |
| $X_4$   | $1.6680 \times 10^2$    | $7.5382 \times 10^3$     | $1.4930 \times 10^4$     | $1.8985 \times 10^5$      | $3.2386 \times 10^4$     | $2.2968 \times 10^8$    |
| $X_5$   | 0.0000                  | $3.1239 \times 10^1$     | $5.6761 \times 10^2$     | $2.0718 \times 10^4$      | $2.6015 \times 10^3$     | $8.6506 \times 10^7$    |
| $Y_1$   | 4.0000                  | $3.6882 \times 10^4$     | $8.3700 \times 10^4$     | $9.8186 \times 10^5$      | $2.0076 \times 10^5$     | $1.0041 \times 10^9$    |
| $Y_2$   | 0.0000                  | $1.3129 \times 10^4$     | $2.9528 \times 10^4$     | $5.2828 \times 10^5$      | $6.8619 \times 10^4$     | $1.2366 \times 10^9$    |
| $Y_3$   | 0.0000                  | $2.9200 \times 10^2$     | $7.8000 \times 10^2$     | $3.0686 \times 10^4$      | $2.3040 \times 10^3$     | $5.9248 \times 10^7$    |
| $X_1^*$ | $3.3825 \times 10^{-4}$ | $5.9934 \times 10^{-3}$  | $1.3128 \times 10^{-2}$  | $1.0885 \times 10^{-1}$   | $2.9924 \times 10^{-2}$  | $1.1517 \times 10^2$    |
| $X_2^*$ | $4.7286 \times 10^{-5}$ | $2.1369 \times 10^{-3}$  | $4.2325 \times 10^{-3}$  | $5.3820 \times 10^{-2}$   | $9.1809 \times 10^{-3}$  | $6.5109 \times 10^1$    |
| $X_3^*$ | 0.0000                  | $5.1046 \times 10^{-5}$  | $9.2750 \times 10^{-4}$  | $3.3853 \times 10^{-2}$   | $4.2509 \times 10^{-3}$  | $1.4135 \times 10^2$    |
| $Y_1^*$ | $2.3581 \times 10^{-7}$ | $2.1743 \times 10^{-3}$  | $4.9344 \times 10^{-3}$  | $5.7884 \times 10^{-2}$   | $1.1836 \times 10^{-2}$  | $5.9194 \times 10^1$    |
| $Y_2^*$ | 0.0000                  | $1.2020 \times 10^{-3}$  | $2.6221 \times 10^{-3}$  | $6.0747 \times 10^{-2}$   | $6.3668 \times 10^{-3}$  | $1.2225 \times 10^2$    |
| $Z_1$   | -7.2311                 | $-4.7671 \times 10^{-1}$ | $1.1314 \times 10^{-1}$  | $-1.7842 \times 10^{-16}$ | $6.3375 \times 10^{-1}$  | 3.5368                  |
| $Z_2$   | $-4.4695 \times 10^1$   | $7.8296 \times 10^{-2}$  | $1.0825 \times 10^{-1}$  | $3.7897 \times 10^{-15}$  | $1.1617 \times 10^{-1}$  | $1.1663 \times 10^{-1}$ |
| $Z_3$   | -6.6617                 | $-5.2698 \times 10^{-1}$ | $8.0653 \times 10^{-2}$  | $1.6523 \times 10^{-16}$  | $6.5071 \times 10^{-1}$  | 3.0989                  |
| $Z_4$   | $-3.0897 \times 10^1$   | $9.0272 \times 10^{-2}$  | $1.2826 \times 10^{-1}$  | $3.7145 \times 10^{-17}$  | $1.4340 \times 10^{-1}$  | $1.5688 \times 10^{-1}$ |
| $U$     | $-6.4415 \times 10^1$   | $-2.2061 \times 10^{-2}$ | $-9.5839 \times 10^{-3}$ | $-6.8971 \times 10^{-2}$  | $-4.2000 \times 10^{-3}$ | $1.7741 \times 10^{-1}$ |

**Table G.2:** Bandwidths used for Local-Linear Regressions in Banking Application

|                                                           | bandwidth               | Lower<br>Bound          | Upper<br>Bound       |
|-----------------------------------------------------------|-------------------------|-------------------------|----------------------|
| <b>Regression of <math>U</math> on <math>Z</math>:</b>    |                         |                         |                      |
| $h_1$                                                     | 1.6522                  | $1.5067 \times 10^{-2}$ | $2.2372 \times 10^1$ |
| $h_2$                                                     | $4.6293 \times 10^1$    | $9.5718 \times 10^{-3}$ | $7.4936 \times 10^1$ |
| $h_3$                                                     | 1.7525                  | $1.5687 \times 10^{-2}$ | $2.1272 \times 10^1$ |
| $h_4$                                                     | $1.8579 \times 10^1$    | $9.1608 \times 10^{-3}$ | $6.3652 \times 10^1$ |
| $h_5$                                                     | $2.6488 \times 10^{-1}$ | 0.0000                  | 1.0000               |
| $h_6$                                                     | $1.2395 \times 10^{-1}$ | 0.0000                  | 1.0000               |
| <b>Regression of Squared Residuals on <math>Z</math>:</b> |                         |                         |                      |
| $h_1$                                                     | $1.1869 \times 10^1$    | $1.5067 \times 10^{-2}$ | $2.2372 \times 10^1$ |
| $h_2$                                                     | $1.5396 \times 10^1$    | $9.5718 \times 10^{-3}$ | $7.4936 \times 10^1$ |
| $h_3$                                                     | 9.6649                  | $1.5687 \times 10^{-2}$ | $2.1272 \times 10^1$ |
| $h_4$                                                     | $4.8877 \times 10^1$    | $9.1608 \times 10^{-3}$ | $6.3652 \times 10^1$ |
| $h_5$                                                     | $5.0575 \times 10^{-1}$ | 0.0000                  | 1.0000               |
| $h_6$                                                     | $5.4680 \times 10^{-1}$ | 0.0000                  | 1.0000               |
| <b>Regression of Cubed Residuals on <math>Z</math>:</b>   |                         |                         |                      |
| $h_1$                                                     | 8.6870                  | $1.5067 \times 10^{-2}$ | $2.2372 \times 10^1$ |
| $h_2$                                                     | $2.5866 \times 10^1$    | $9.5718 \times 10^{-3}$ | $7.4936 \times 10^1$ |
| $h_3$                                                     | 9.6712                  | $1.5687 \times 10^{-2}$ | $2.1272 \times 10^1$ |
| $h_4$                                                     | $2.7969 \times 10^1$    | $9.1608 \times 10^{-3}$ | $6.3652 \times 10^1$ |
| $h_5$                                                     | $5.1500 \times 10^{-1}$ | 0.0000                  | 1.0000               |
| $h_6$                                                     | $5.4759 \times 10^{-1}$ | 0.0000                  | 1.0000               |

**Table G.3:** Summary Statistics for Estimated Derivatives (SVKZ)

|                                 | .05 Quantile | 1st Quartile | Median  | Mean    | 3rd Quartile | .95 Quantile | Pct     |
|---------------------------------|--------------|--------------|---------|---------|--------------|--------------|---------|
| $\partial X_2^*/\partial X_1^*$ | -0.0735      | -0.0232      | -0.0147 | -0.0155 | -0.0093      | 0.1855       | 86.2232 |
| $\partial X_3^*/\partial X_1^*$ | -2.7029      | 0.0393       | 0.1086  | -0.3380 | 0.2957       | 0.8907       | 14.5539 |
| $\partial X_3^*/\partial X_2^*$ | 1.5695       | 3.9892       | 9.3864  | 60.7204 | 19.1904      | 44.4816      | 0.8194  |
| $\partial Y_1^*/\partial X_1^*$ | 0.3973       | 0.4062       | 0.4168  | 0.4787  | 0.4405       | 0.6899       | 99.8436 |
| $\partial Y_1^*/\partial X_2^*$ | -5.9077      | 11.5886      | 22.4781 | 2.3402  | 33.2353      | 50.5607      | 86.1078 |
| $\partial Y_1^*/\partial X_3^*$ | -12.3783     | -5.2030      | -2.3778 | -3.6729 | -0.6839      | 0.3847       | 14.7103 |
| $\partial Y_2^*/\partial X_1^*$ | 0.1786       | 0.6603       | 0.6917  | 0.6243  | 0.7371       | 0.8367       | 96.3479 |
| $\partial Y_2^*/\partial X_2^*$ | -5.1261      | 19.4873      | 37.2362 | 17.3778 | 55.5525      | 85.5500      | 89.8744 |
| $\partial Y_2^*/\partial X_3^*$ | -22.5386     | -9.2115      | -3.7292 | -6.4038 | -1.1424      | 0.2825       | 10.9022 |
| $\partial Y_2^*/\partial Y_1^*$ | -1.9264      | -1.7274      | -1.6558 | -1.4963 | -1.5567      | -0.2551      | 96.1919 |
| Scale Elasticity                | 1.6858       | 3.1036       | 4.3803  | 6.4313  | 6.2496       | 11.5679      | 98.1166 |

NOTE: The column labeled "Pct" gives the percentage of observations yielding estimates with the expected signs. As discussed in Section 4,  $X_3^*$  was initially viewed as a quasi-fixed input, but the estimates for  $\partial X_3^*/\partial X_1^*$ ,  $\partial X_3^*/\partial X_2^*$ ,  $\partial Y_1^*/\partial X_3^*$  and  $\partial Y_2^*/\partial X_3^*$  suggest that  $X_3^*$  behaves as an undesirable output. Viewed as such, the derivatives listed above have the expected signs in 85.4461, 99.1806, 85.2897 and 89.0978 percent (respectively) of the sample observations.

**Table G.4:** Percentage of Estimated Derivatives of  $\mu_\eta(W_i^\partial)$  Less than, Equal to or Greater than Zero (SVKZ Estimates)

|         | Pct < 0                 | Pct = 0 | Pct > 0 |
|---------|-------------------------|---------|---------|
| $X_1^*$ | 21.4235                 | 39.6702 | 38.9063 |
| $X_2^*$ | 51.3412                 | 39.6702 | 8.9886  |
| $X_3^*$ | $2.0557 \times 10^{-4}$ | 39.6702 | 60.3296 |
| $Y_1^*$ | 3.0952                  | 39.6702 | 57.2346 |
| $Y_2^*$ | 47.6071                 | 39.6702 | 12.7227 |

## G.2 Results Obtained from HMS Estimators

We use the modification of the SVKZ estimators proposed by HMS and described in Appendix B to estimate bank efficiency, parallel to the estimation described in Section 4 of the main paper. As discussed in Appendix B, the HMS estimators avoid estimates of  $\sigma_\eta(Z_i)$  equal to zero, which as seen in Section 4 occurs in more than a third of the sample observations due to positive skewness of estimated residuals in a neighborhood of  $Z_i$ . Results obtained with the HMS estimators are described here.

Figure G.1 plots means of HMS estimates of conditional expected inefficiency  $\mu_\eta(Z_i)$  in each quarter 2001Q1–2020Q4 as a function of time, similar to Figure 2 in the main paper. Comparing the curves in Figure G.1 with those in Figure 2, it is clear that the means of conditional expected inefficiency obtained with the HMS estimators follow the same pattern as those obtained with the SVKZ estimators. However, because the HMS estimators eliminate the zero estimates for  $\mu_\eta(Z_i)$ , the means (and medians) shown in Figure G.1 are larger than the corresponding means and medians shown in Figure 2, as one should expect. In addition, the means in Figure G.1 are larger than the medians in each quarter, while the reverse is true in Figure 2. As noted in Section 4, the magnitudes of the mean and medians of the estimates  $\hat{\mu}_\eta(Z_i)$  are proportional to the length (0.01427) of the direction vector.

Analogous to Table G.3, Table G.5 gives summary statistics for estimates of marginal rates of substitution, marginal products, marginal rates of transformation and scale elasticities obtained using the HMS estimators. As in Table G.3, the last column in Table G.5 gives the percentage of observations with signs one should expect, i.e., negative signs for marginal rates of substitution and transformation, and positive signs for marginal products and scale elasticities. However, as noted in Section 4, given our use of nonparametric, local estimation, one should expect some noise in the estimates, and some to have wrong signs. Nonetheless, the estimates shown in Table G.5 are qualitatively similar to those described in Table G.3 in the sense that the percentage of estimates with the expected signs are sim-



ilar across the two tables. In addition, the derivatives involving non-performing loans ( $X_3^*$ ) here too indicate that this variable should be viewed as an undesirable output. As noted in Section 4 of the main paper, using a zero direction for this variable means that our initial view of the non-performing loans variable as a fixed input has no bearing on the estimation. Treating the variable as a fixed, undesirable output merely amounts to changing the label on the variable from  $X_3^*$  to  $Y_3^*$ .

Table G.6 gives percentages of estimated derivatives of the conditional expectation of inefficiency given in (2.32) and obtained with the HMS estimators. In contrast to Table G.4 giving similar percentages obtained with the SVKZ estimators, the results in Table G.6 reveal that none of the estimated derivatives are equal to zero. The number of negative estimates ranges from about 43.8 to 60.3 percent, while the number of positive estimates ranges from approximately 41.2 to 56.2 percent. As discussed in Section 4, the evidence suggests heteroskedasticity in the inefficiency process, and our model and estimation strategy allow for this.

Turning to the HMS estimates  $\hat{\sigma}_\epsilon^2(Z_i)$ , 485,664 (more than 99.8 percent of the sample observations) are equal to zero, suggesting almost no noise in the DGP. This is a consequence of eliminating zero values for  $\hat{\sigma}_\eta(Z_i)$ . Under the assumptions of the model,  $\eta_i = 0$  is a measure-zero event, and hence in this sense the HMS estimates more closely accord with the model assumptions than the SVKZ estimates.

**Table G.5:** Summary Statistics for Estimated Derivatives (HMS)

|                                 | .05 Quantile | 1st Quartile | Median  | Mean    | 3rd Quartile | .95 Quantile | Pct     |
|---------------------------------|--------------|--------------|---------|---------|--------------|--------------|---------|
| $\partial X_2^*/\partial X_1^*$ | -0.5584      | -0.0379      | -0.0183 | 0.0579  | -0.0117      | 0.9190       | 90.0171 |
| $\partial X_3^*/\partial X_1^*$ | -13.2208     | 0.0456       | 0.1821  | -1.2340 | 0.6206       | 6.6530       | 10.3568 |
| $\partial X_3^*/\partial X_2^*$ | 1.7431       | 4.6060       | 9.5673  | 14.2599 | 21.1442      | 42.6848      | 0.4159  |
| $\partial Y_1^*/\partial X_1^*$ | -0.1624      | 0.4034       | 0.4143  | 0.5515  | 0.4316       | 1.5574       | 92.1959 |
| $\partial Y_1^*/\partial X_2^*$ | -1.9019      | 1.2784       | 18.9205 | 18.5220 | 29.0405      | 45.6179      | 82.2541 |
| $\partial Y_1^*/\partial X_3^*$ | -12.3805     | -4.1308      | -1.5472 | -3.2049 | -0.1482      | 0.1240       | 18.1601 |
| $\partial Y_2^*/\partial X_1^*$ | -1.4380      | 0.6631       | 0.6982  | 0.4193  | 0.7674       | 2.1193       | 92.3073 |
| $\partial Y_2^*/\partial X_2^*$ | 0.7422       | 5.4664       | 31.4806 | 31.7445 | 47.8855      | 75.2565      | 96.3193 |
| $\partial Y_2^*/\partial X_3^*$ | -22.5524     | -7.0502      | -2.4810 | -5.6024 | -0.6808      | -0.0299      | 4.0447  |
| $\partial Y_2^*/\partial Y_1^*$ | -7.4932      | -1.7299      | -1.6494 | -2.4336 | -1.5401      | 5.0394       | 85.3641 |
| Scale Elasticity                | -61.9995     | -3.8396      | 5.9717  | 2.8298  | 16.3658      | 56.4053      | 67.3330 |

NOTE: The column labeled "Pct" gives the percentage of observations yielding estimates with the expected signs. As discussed in Section 4,  $X_3^*$  was initially viewed as a quasi-fixed input, but the estimates for  $\partial X_3^*/\partial X_1^*$ ,  $\partial X_3^*/\partial X_2^*$ ,  $\partial Y_1^*/\partial X_3^*$  and  $\partial Y_2^*/\partial X_3^*$  suggest that  $X_3^*$  behaves as an undesirable output. Viewed as such, the derivatives listed above have the expected signs in 89.6432, 99.5841, 81.8399 and 95.9553 percent (respectively) of the sample observations.

**Table G.6:** Percentage of Estimated Derivatives of  $\mu_\eta(W_i^\partial)$  Less than, Equal to or Greater than Zero (HMS Estimates)

|         | Pct < 0 | Pct = 0 | Pct > 0 |
|---------|---------|---------|---------|
| $X_1^*$ | 53.4203 | 0.0000  | 46.5797 |
| $X_2^*$ | 44.5076 | 0.0000  | 55.4924 |
| $X_3^*$ | 60.3306 | 0.0000  | 39.6694 |
| $Y_1^*$ | 58.8417 | 0.0000  | 41.1583 |
| $Y_2^*$ | 43.8448 | 0.0000  | 56.1552 |

**Figure G.1:** Sample Average and Median Values of  $\hat{\mu}_\eta(Z_i)$ , HMS Estimates, 2001Q1–2020Q4

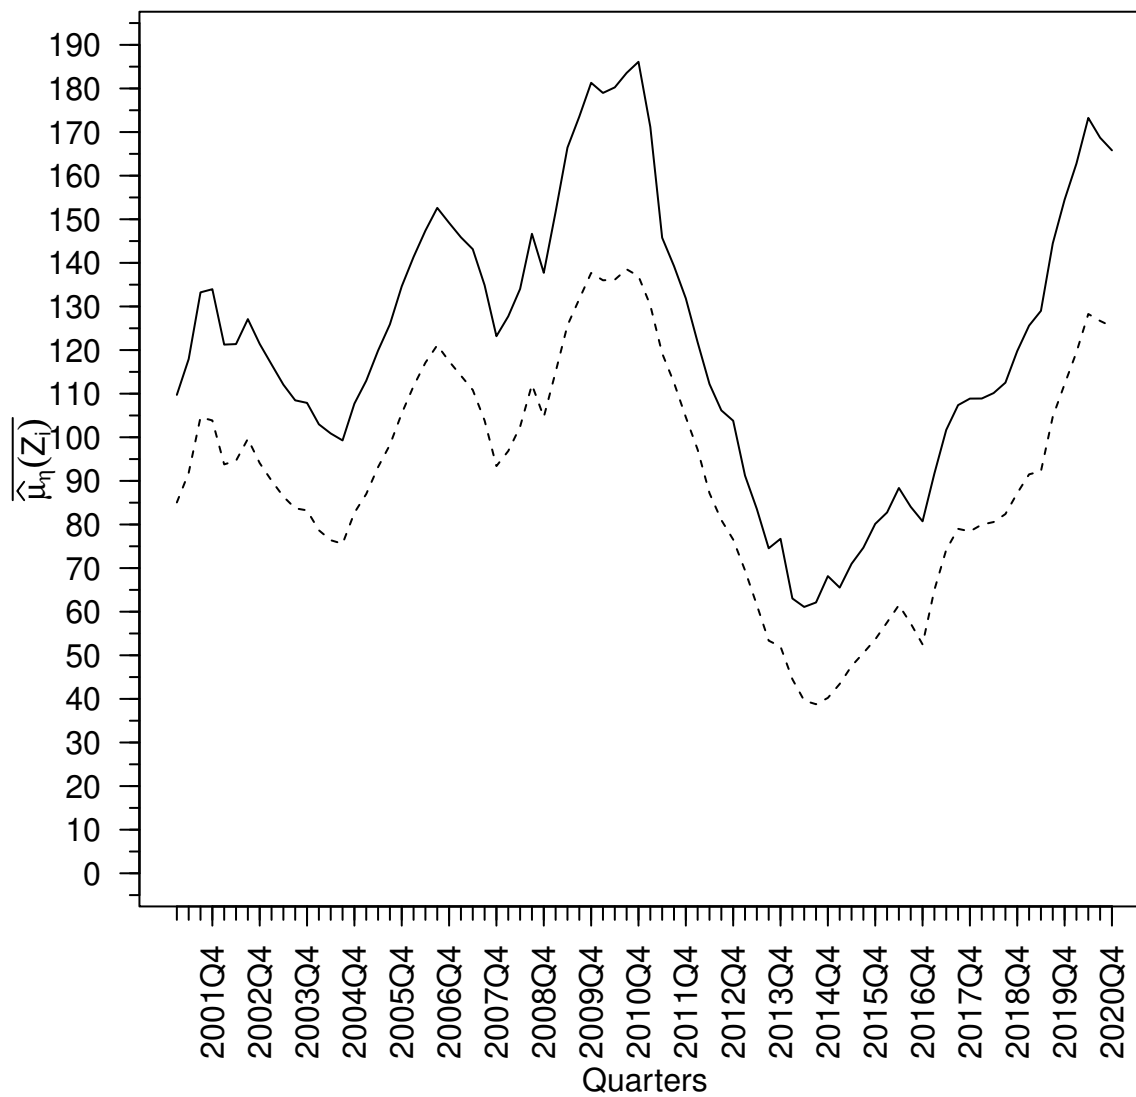

NOTE: Averages are indicated by the solid curve, while medians are represented by the dashed curve.

## References

- Atkinson, S. E. and M. G. Tsionas (2016), Directional distance functions: Optimal endogenous directions, *Journal of Econometrics* 190, 301–314.
- Daouia, A., J. P. Florens, and L. Simar (2020), Robust frontier estimation from noisy data: A tikhonov regularization approach, *Econometrics and Statistics* 14, 1–23.
- Du, P., C. F. Parmeter, and J. S. Racine (2016), Nonparametric kernel regression with multiple predictors and multiple shape constraints, *Statistica Sinica* 23, 1347–1371.
- Fan, J. and I. Gijbels (1996), *Local Polynomial Modelling and Its Applications*, London: Chapman and Hall.
- Färe, R., S. Grosskopf, and C. A. K. Lovell (1985), *The Measurement of Efficiency of Production*, Boston: Kluwer-Nijhoff Publishing.
- Färe, R., C. Pasurka, and M. Vardanyan (2017), On endogenizing direction vectors in parametric directional distance function-based models, *European Journal of Operational Research* 262, 361–369.
- Farrell, M. J. (1957), The measurement of productive efficiency, *Journal of the Royal Statistical Society A* 120, 253–281.
- Florens, J. P., L. Simar, and I. Van Keilegom (2020), Estimation of the boundary of a variable observed with symmetric error, *Journal of the American Statistical Association* 115, 425–441.
- Hall, P. and L. S. Huang (2001), Nonparametric kernel regression subject to monotonicity constraints, *Annals of Statistics* 29, 624–647.
- Hall, P. and L. Simar (2002), Estimating a changepoint, boundary or frontier in the presence of observation error, *Journal of the American Statistical Association* 97, 523–534.
- Kneip, A., L. Simar, and I. Van Keilegom (2015), Frontier estimation in the presence of measurement error with unknown variance, *Journal of Econometrics* 184, 379–393.
- Kumbhakar, S. C., B. U. Park, L. Simar, and E. G. Tsionas (2007), Nonparametric stochastic frontiers: A local likelihood approach, *Journal of Econometrics* 137, 1–27.
- Layer, K., A. L. Johnson, R. C. Sickles, and G. D. Ferrier (2020), Direction selection in stochastic directional distance functions, *European Journal of Operational Research* 280, 351–364.
- Liew, C. K. (1976), Inequality constrained least-squares estimation, *Journal of the American Statistical Association* 71, 746–751.
- Marsaglia, G. (1972), Choosing a point from the surface of a sphere, *Annals of Mathematical Statistics* 43, 645–646.
- Muller, M. E. (1959), A note on a method for generating points uniformly on  $n$ -dimensional spheres, *Communications of the Association for Computing Machinery* 2, 19–20.
- Nelder, J. A. and R. Mead (1965), A simplex method for function minimization, *The Computer Journal* 7, 308–313.

- Olson, J. A., P. Schmidt, and D. M. Waldman (1980), A monte carlo study of estimators of stochastic frontier production functions, *Journal of Econometrics* 13, 67–82.
- Papadopoulos, A. and C. F. Parmeter (2021), Type II failure and specification testing in the stochastic frontier model, *European Journal of Operational Research* 293, 990–1001.
- Robinson, P. M. (1988), Root- $n$ -consistent semiparametric regression, *Econometrica* 56, 931–954.
- Simar, L. and P. W. Wilson (2007), Estimation and inference in two-stage, semi-parametric models of productive efficiency, *Journal of Econometrics* 136, 31–64.
- (2010), Estimation and inference in cross-sectional, stochastic frontier models, *Econometric Reviews* 29, 62–98.
- Simar, L. and V. Zelenyuk (2011), Stochastic FDH/DEA estimators for frontier analysis, *Journal of Productivity Analysis* 36, 1–20.
- Vardanyan, M. and D.-W. Noh (2006), Approximating pollution abatement costs via alternative specifications of a multi-output production technology: A case of the US electric utility industry, *Journal of Environmental Management* 80, 177–190.
- Ziegelmann, F. (2002), Nonparametric estimation of volatility functions: The local exponential estimator, *Econometric Theory* 18, 985–991.
